# Supplementary material for: Conservation and divergence of microRNAs and their functions in Euphorbiaceous plants
Source: PubMed Central journal article supplement — Nucleic Acids Res. 2009 Nov 26;38(3):981–95. doi: 10.1093/nar/gkp1035 (PMC2817462; doi:10.1093/nar/gkp1035), 2009-11-26

Supplementary Figure S1. The second structures of 85 pre-miRNAs in Castor bean.

rco-miR156a

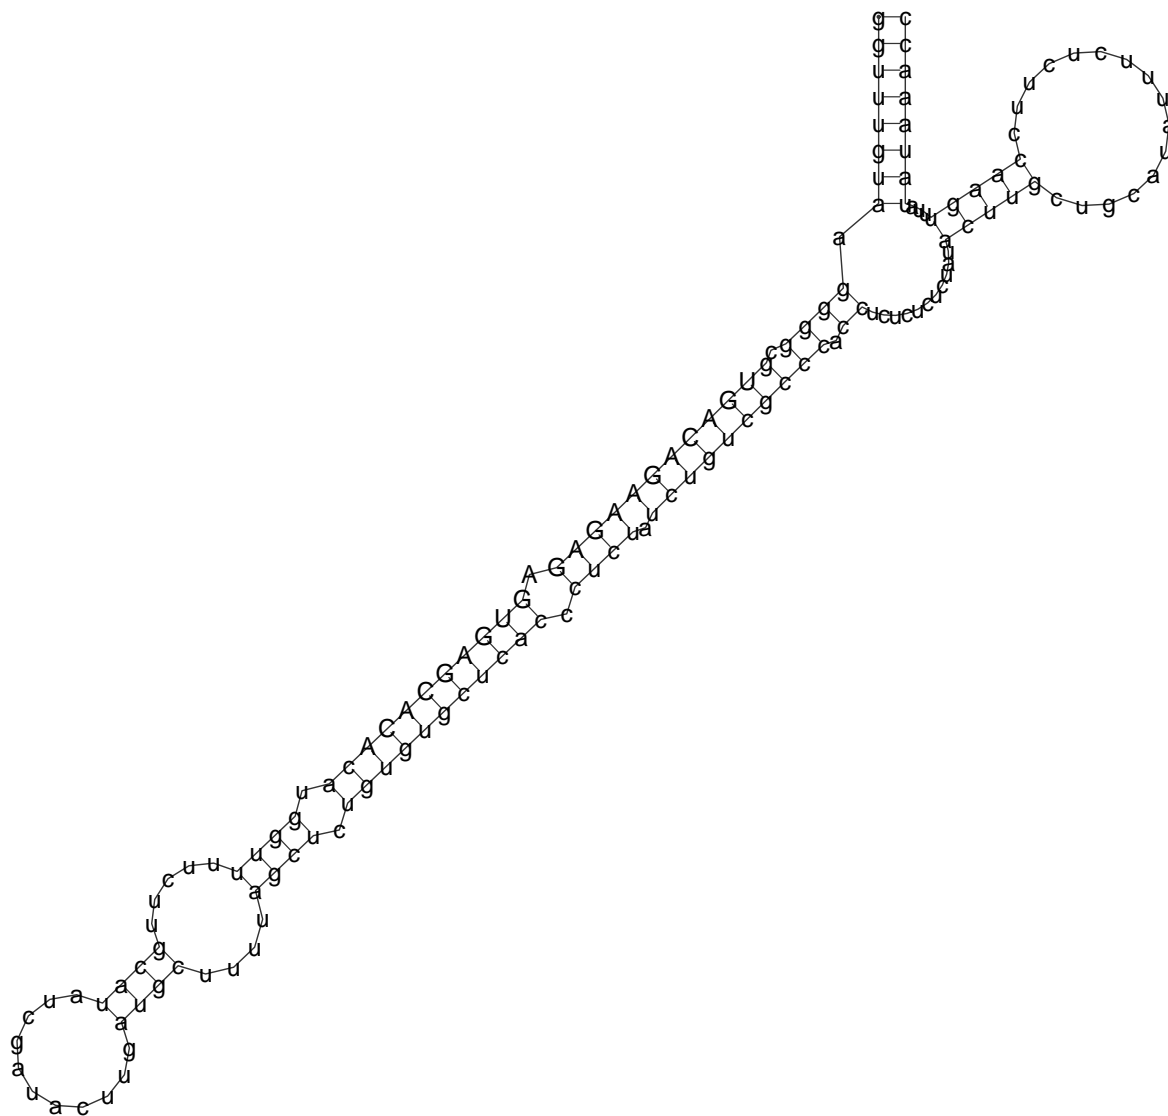



rco-miR156c

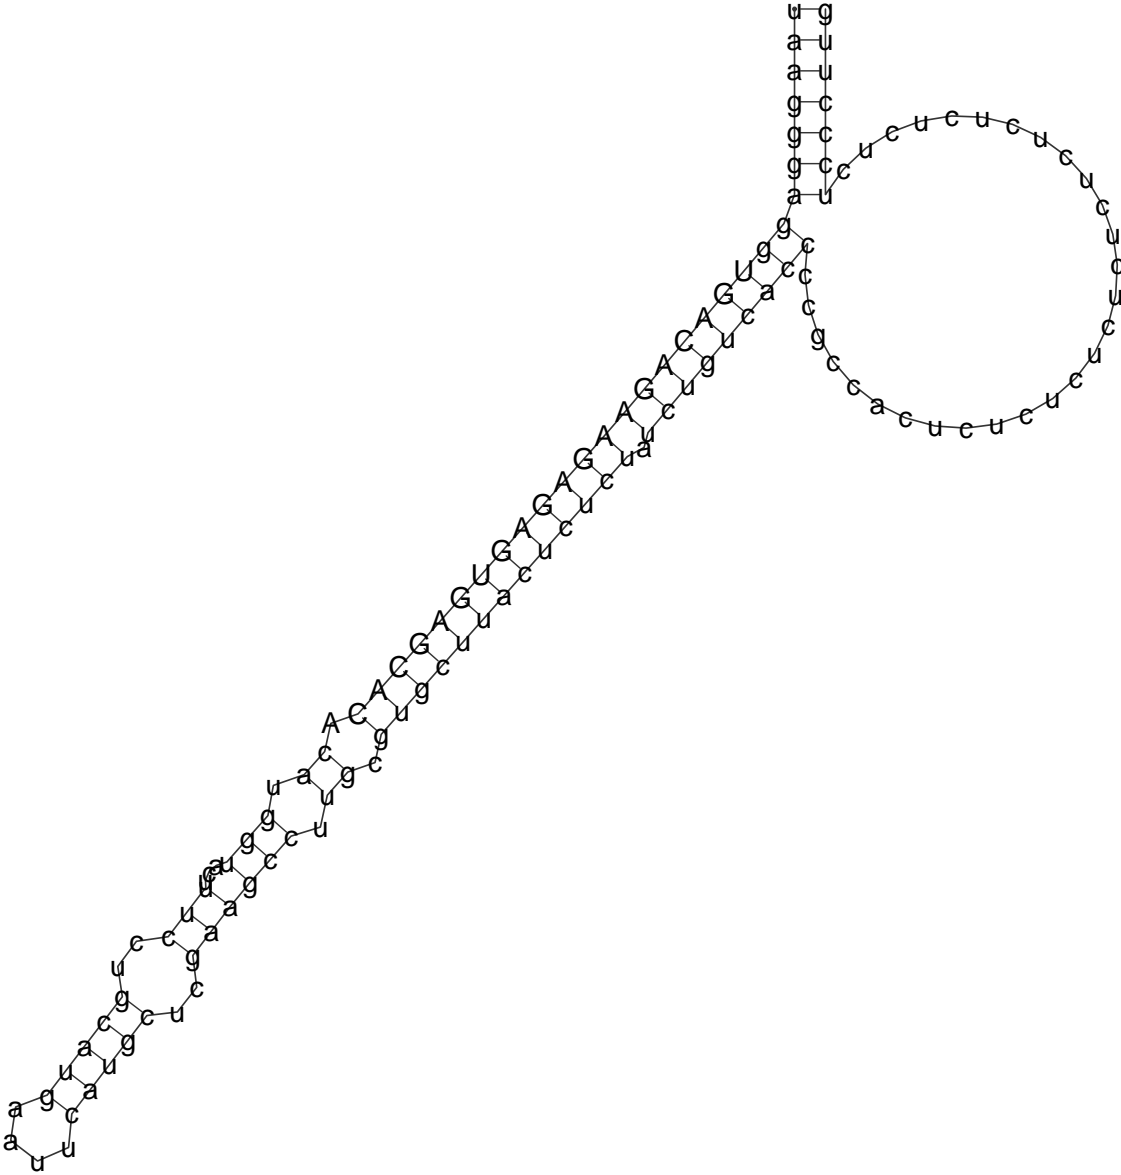

rco-miR156d

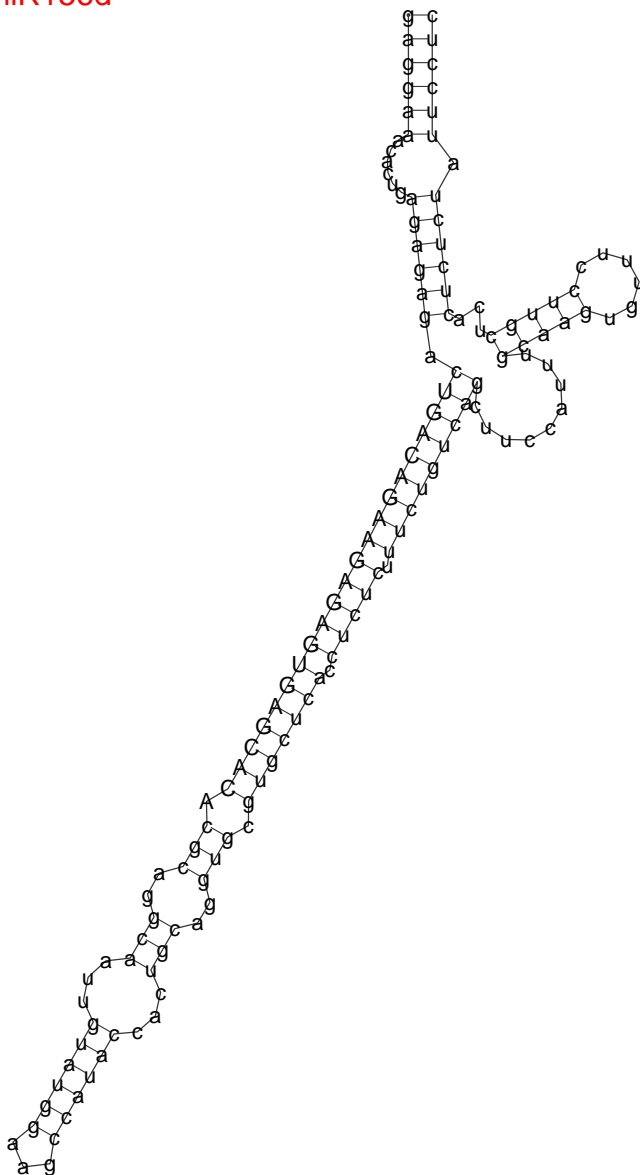

rco-miR156e

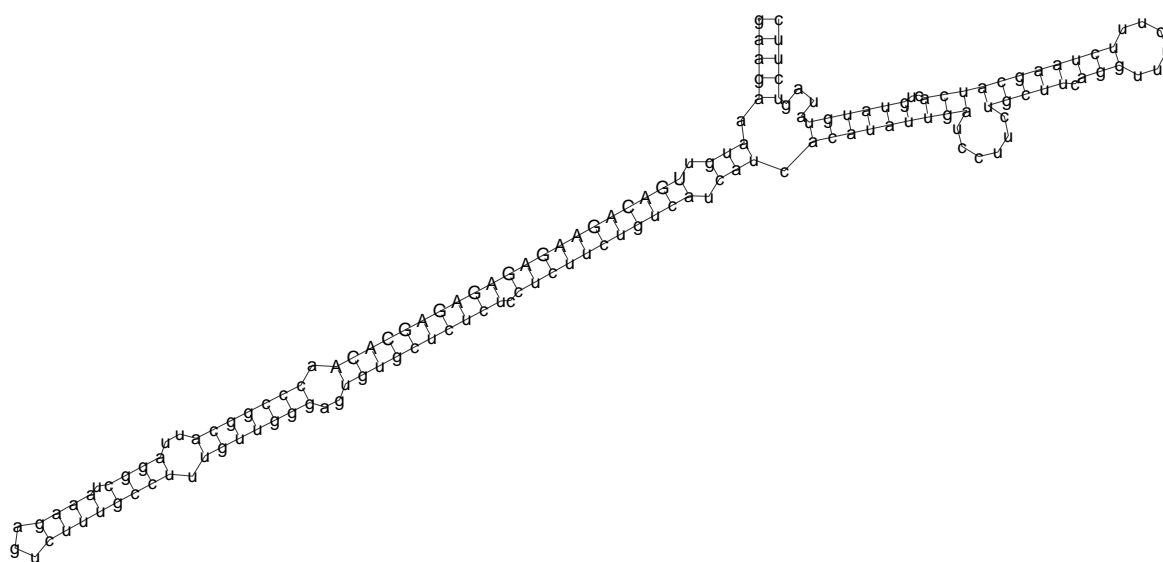

rco-miR157a

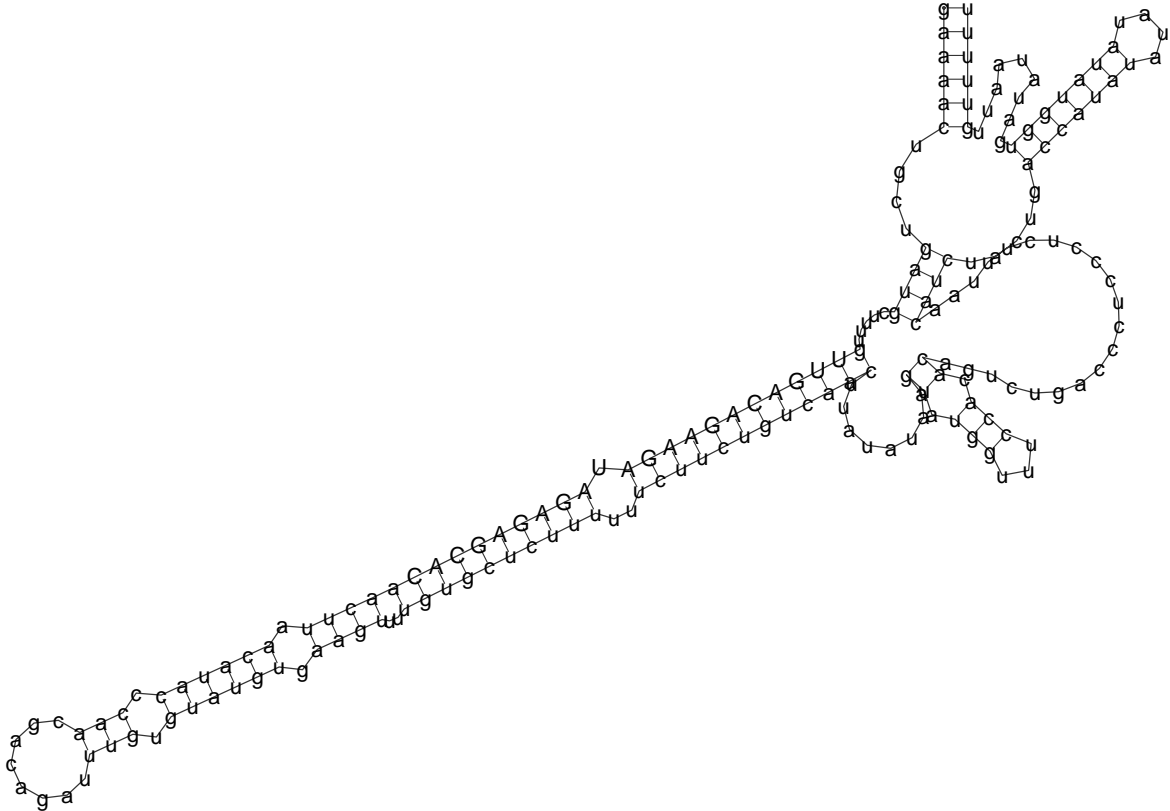

rco-miR157b

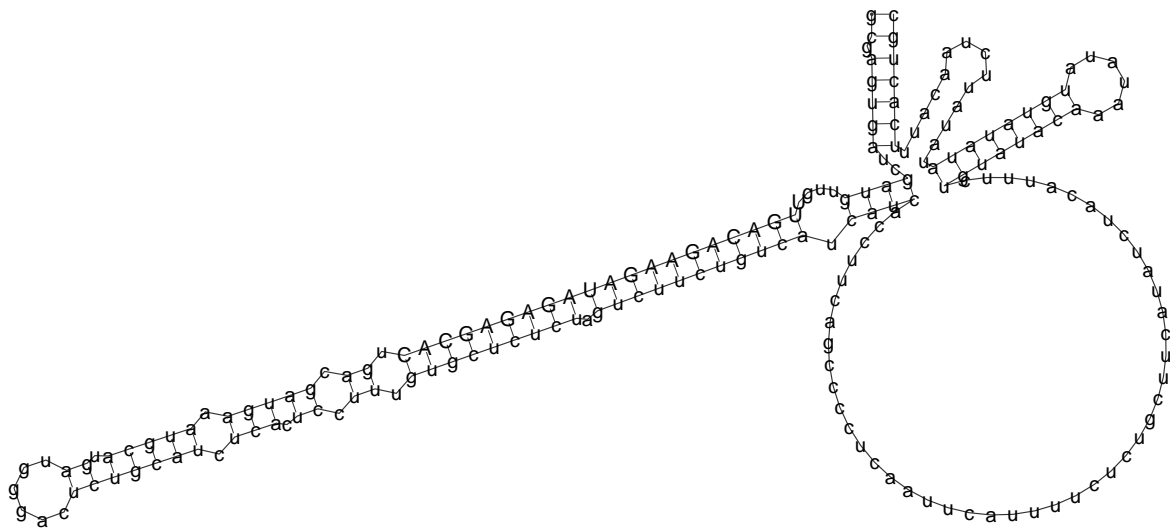

rco-miR157c

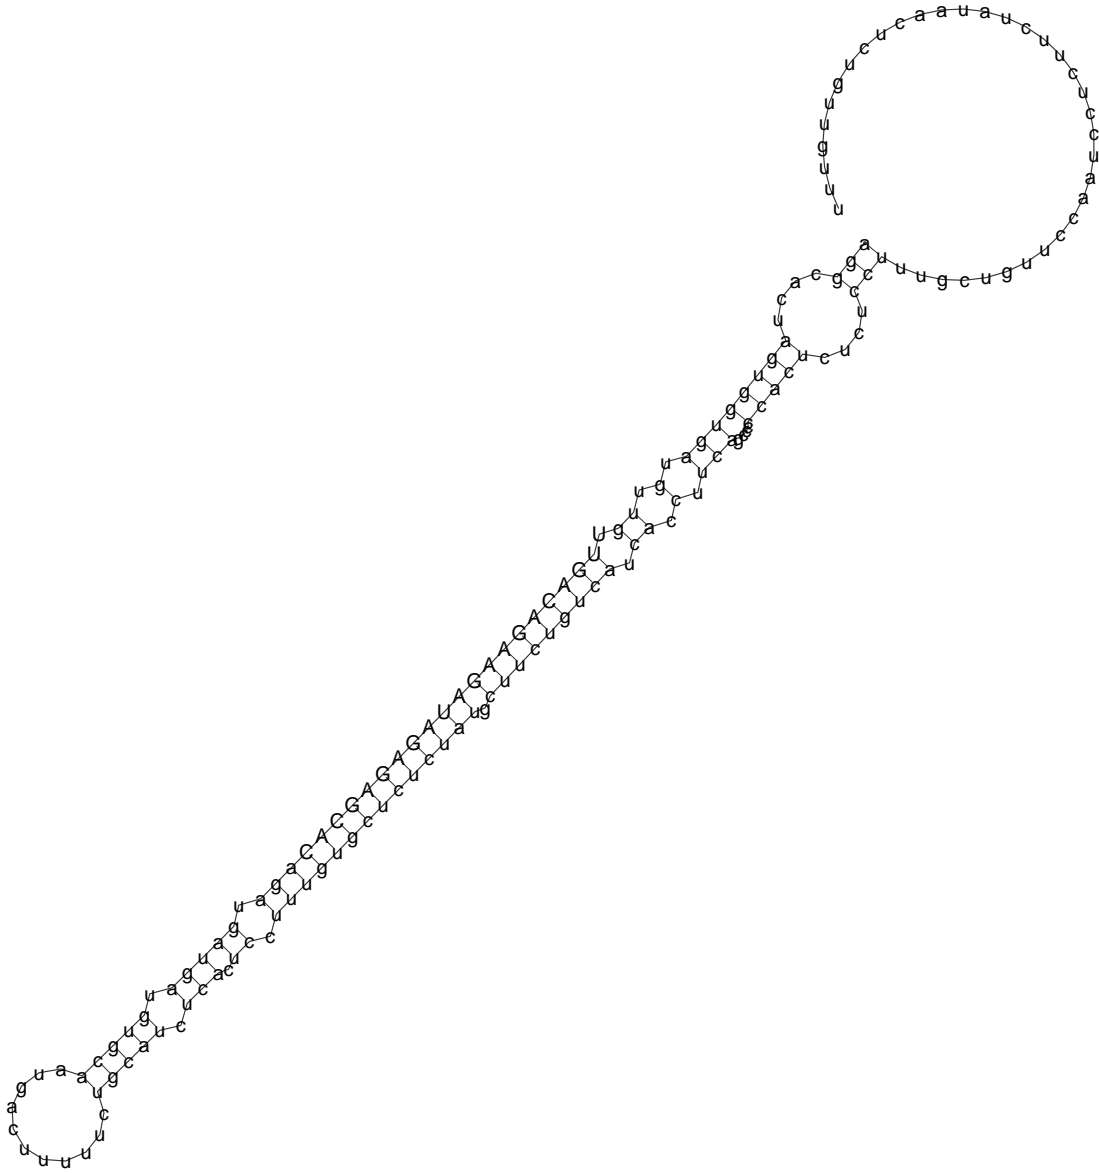



rco-miR159

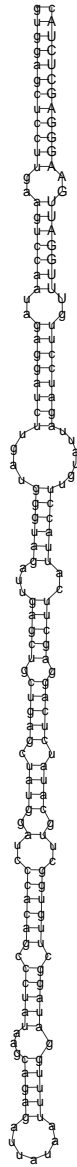

rco-miR160a

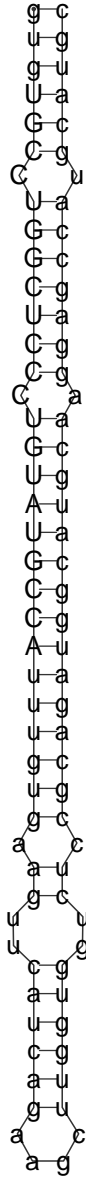

rco-miR160b

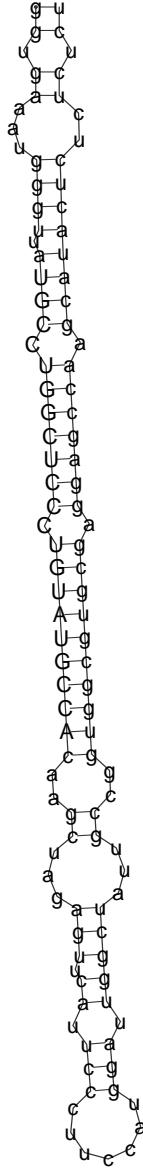

rco-miR160c

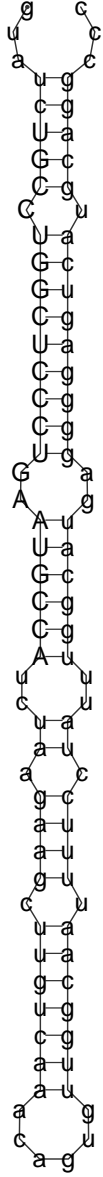

rco-miR162

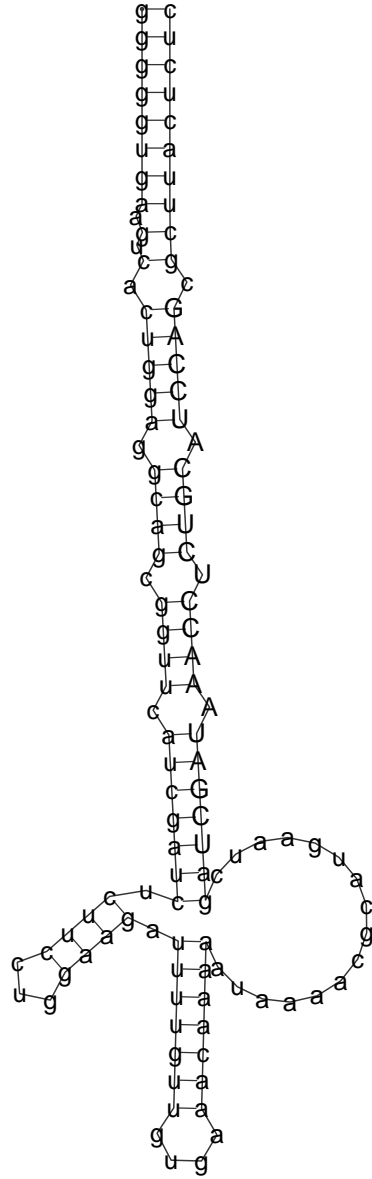

rco-miR164a

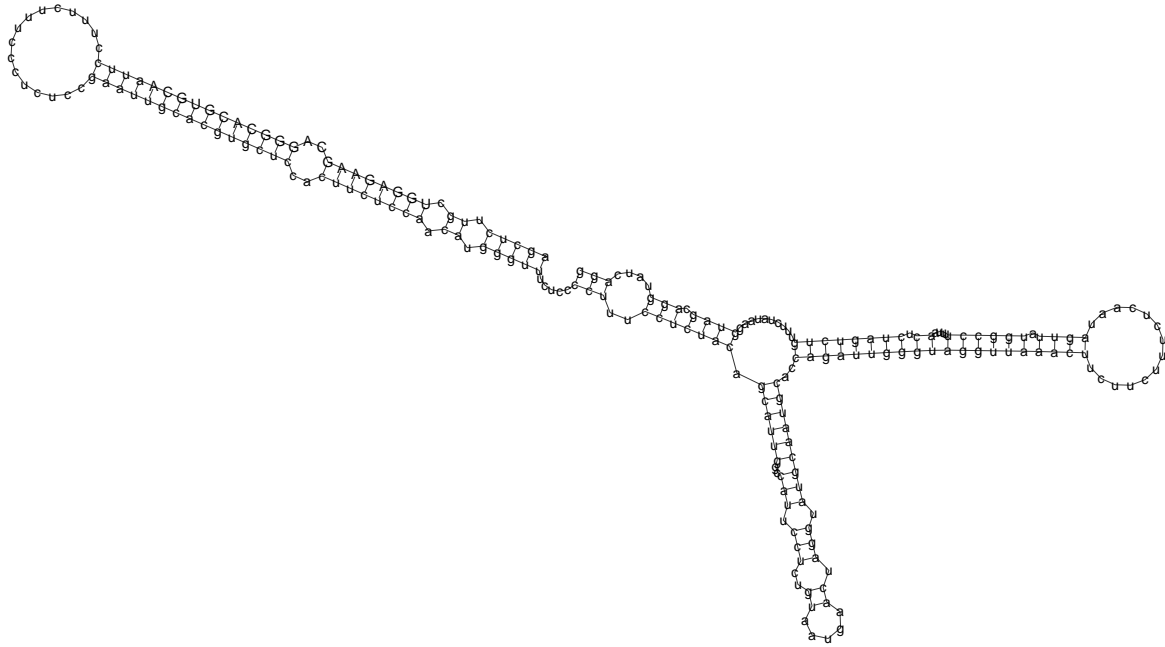



rco-miR164c

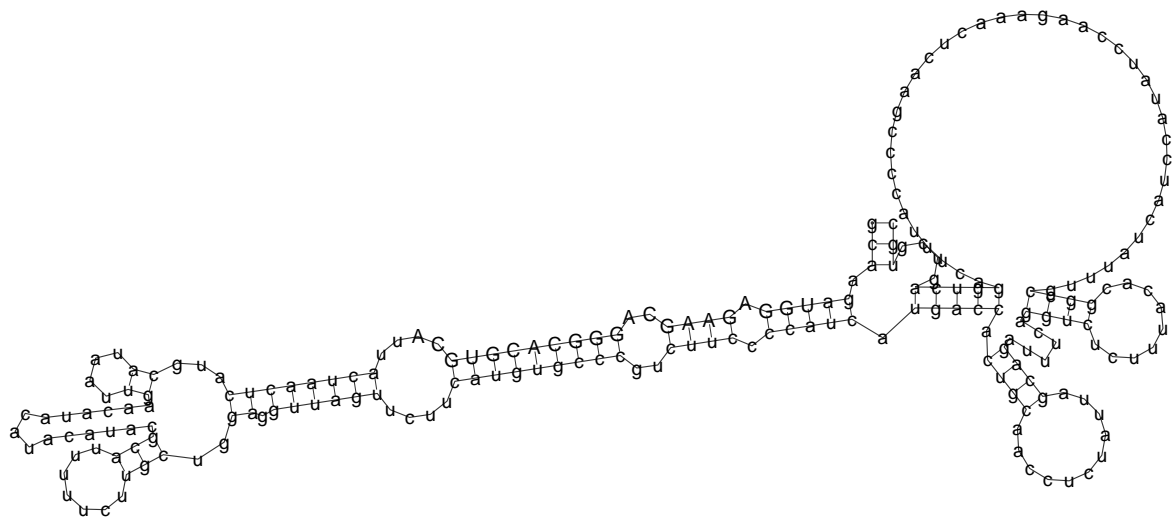



rco-miR164d

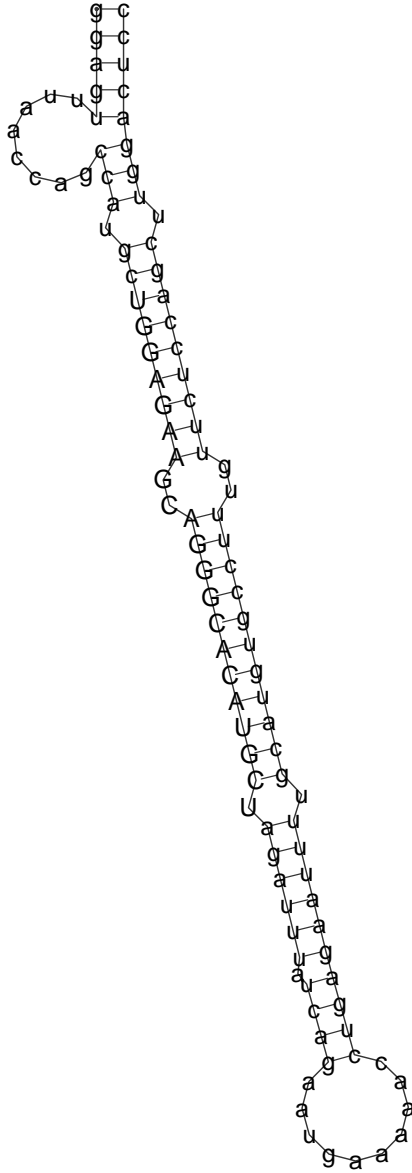

rco-miR166a

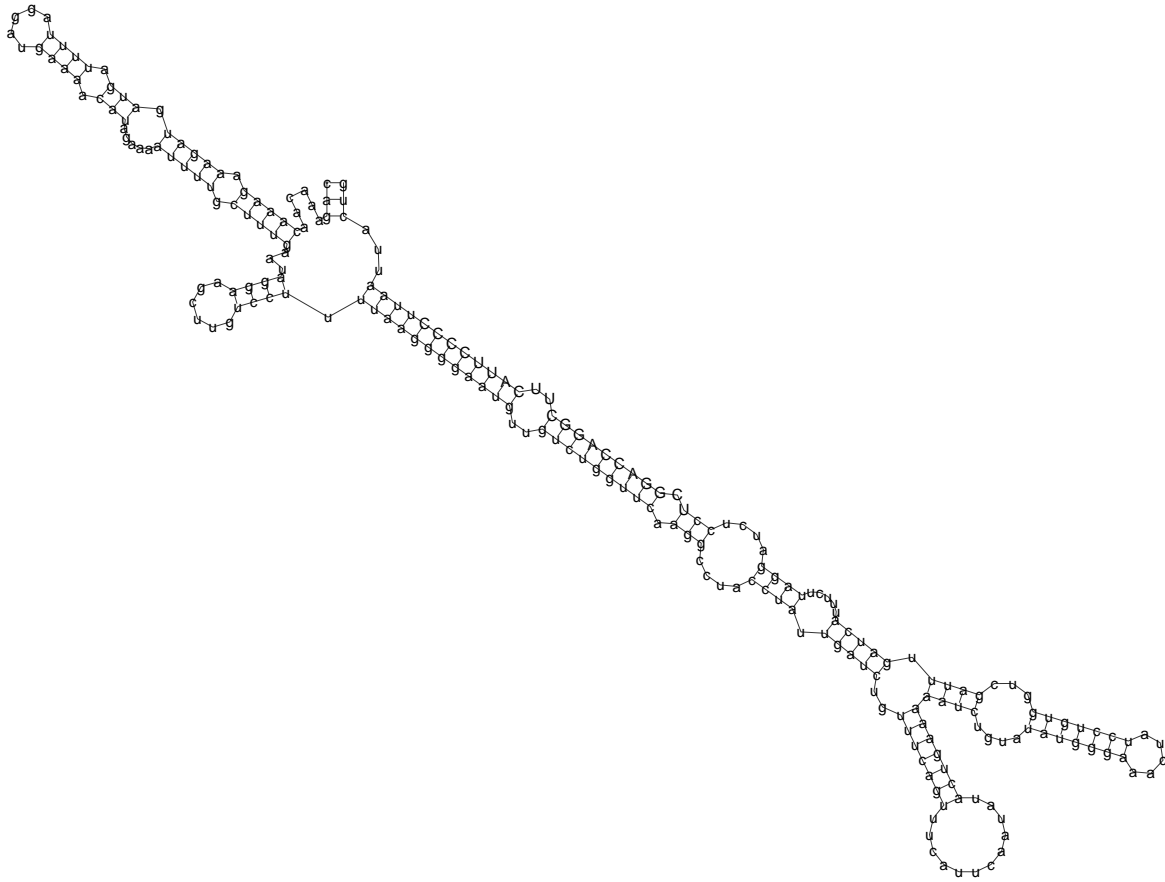

rco-miR166b

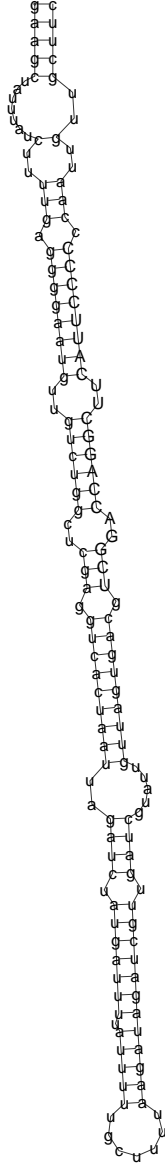

rco-miR166c

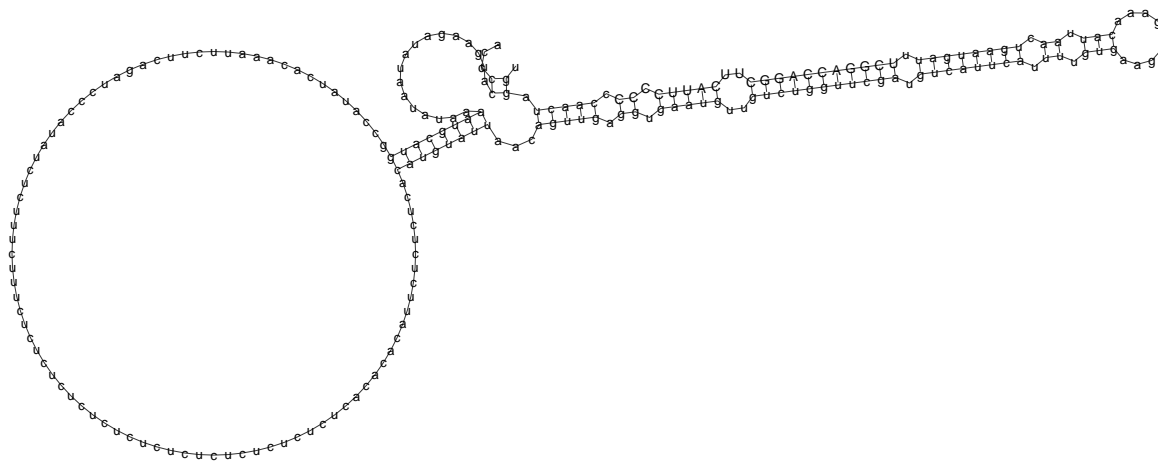

rco-miR166d

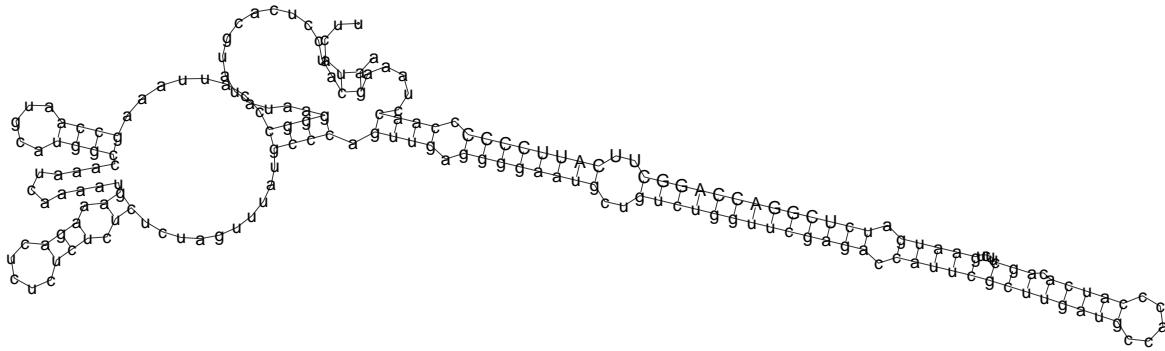

rco-miR166e

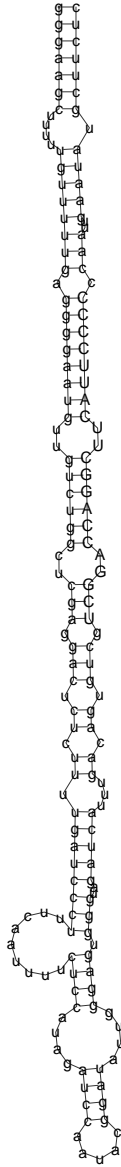

rco-miR167a

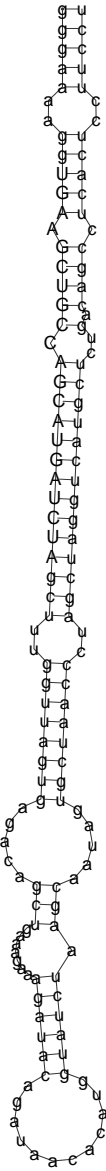

rco-miR167b

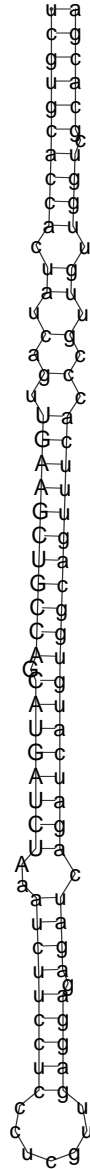





rco-miR168

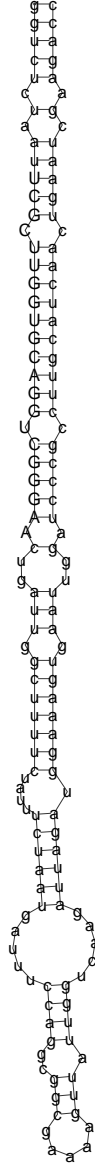

rco-miR169a

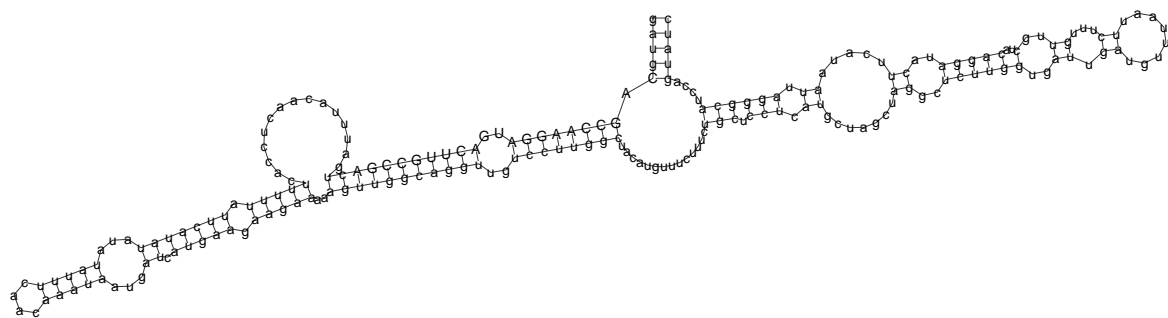

rco-miR169b

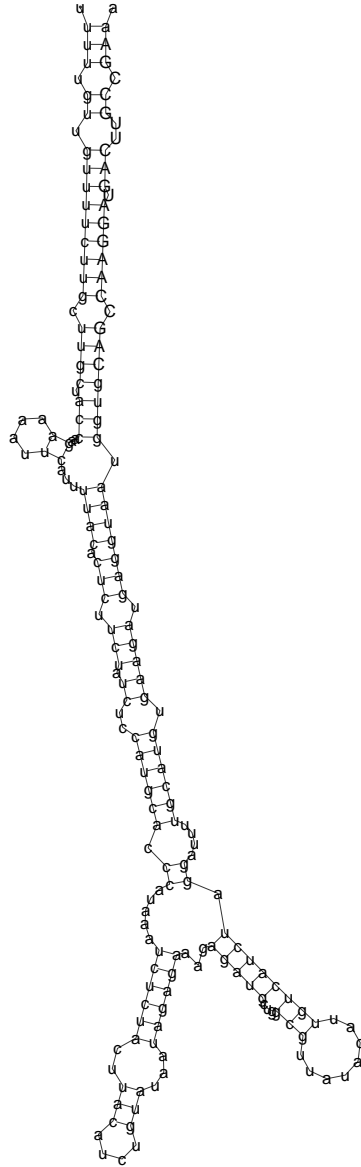

rco-miR169c

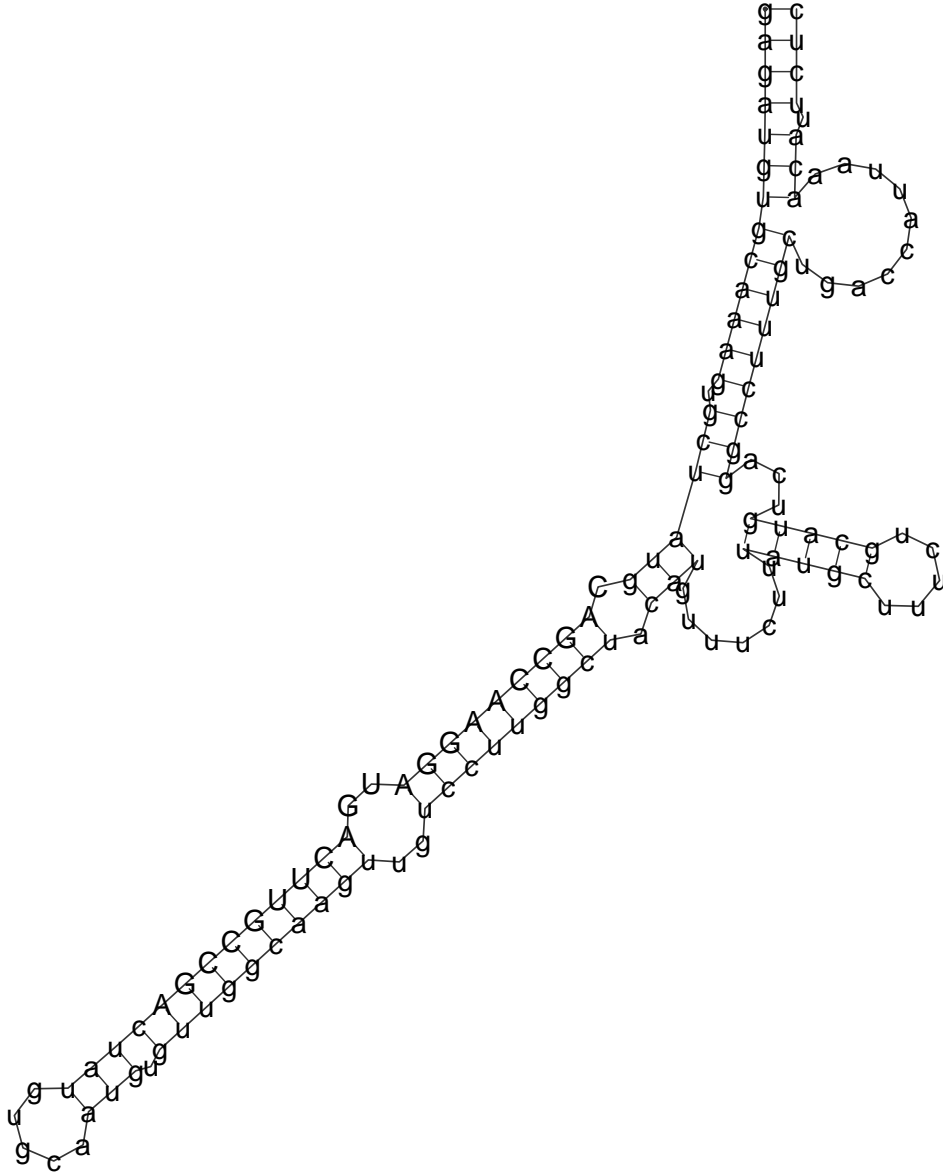

rco-miR169d

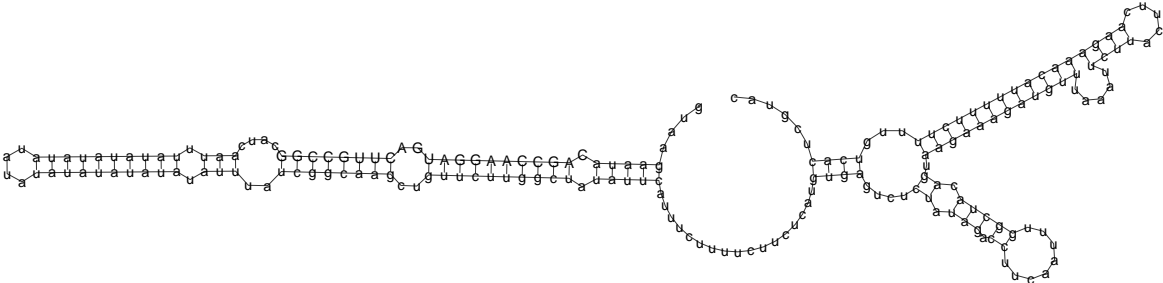



rco-miR169f

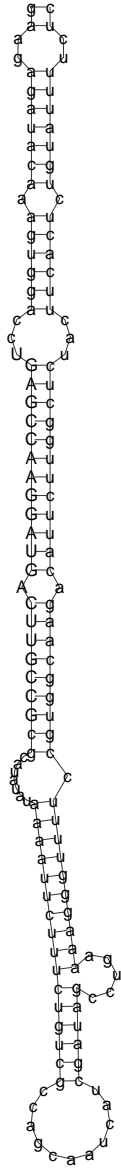



rco-miR169g

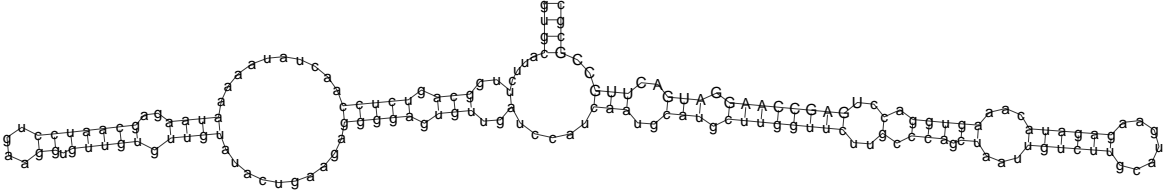







rco-miR169k

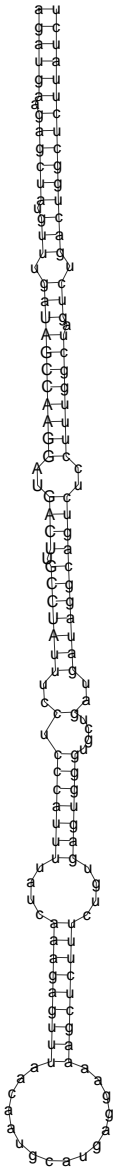



rco-miR169m

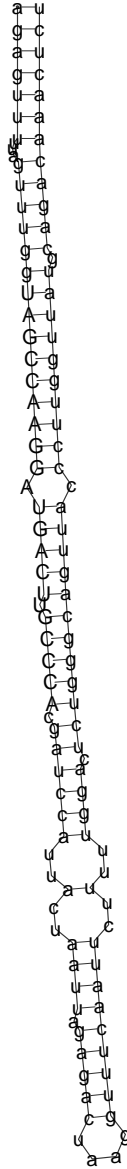

rco-miR169n

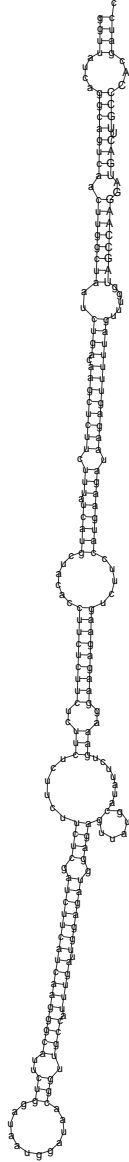



rco-miR171a

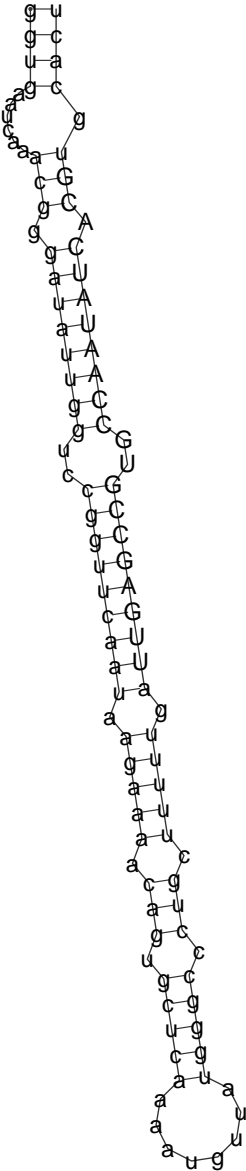

rco-miR171b

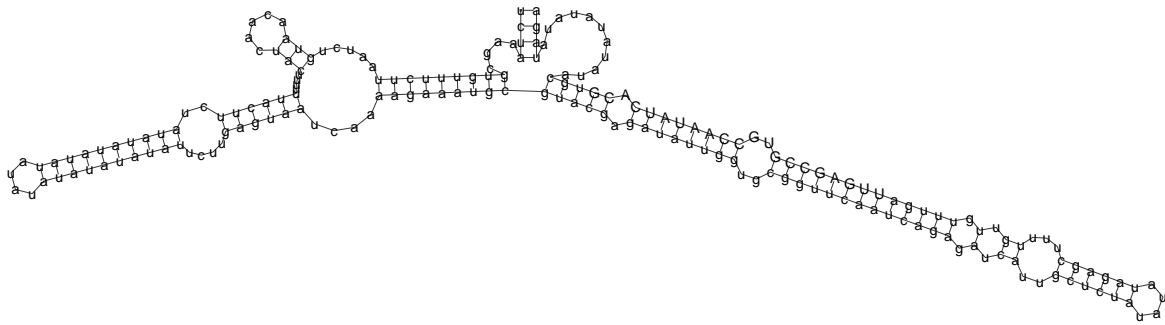

rco-miR171c

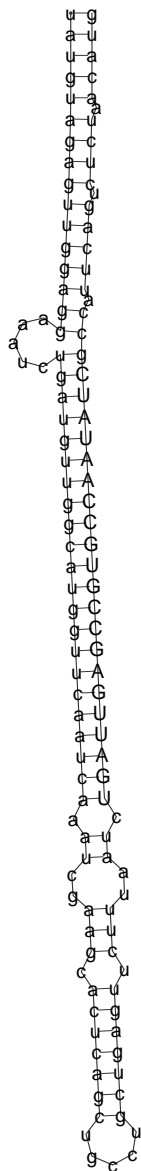

rco-miR171d

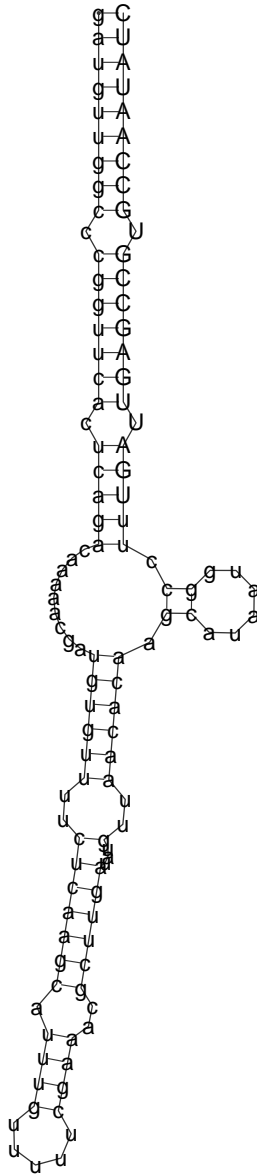

rco-miR171e

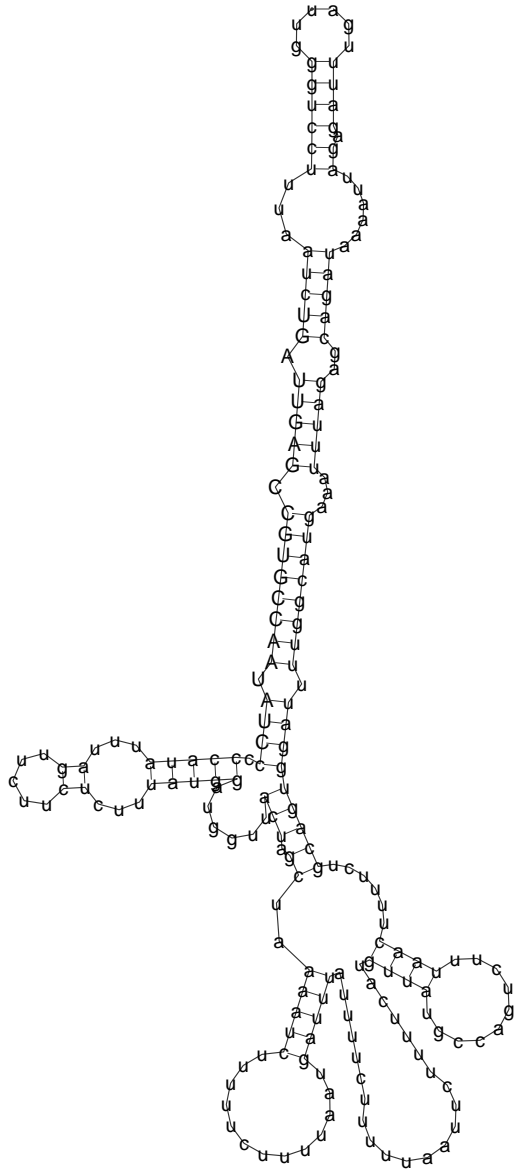

rco-miR171f

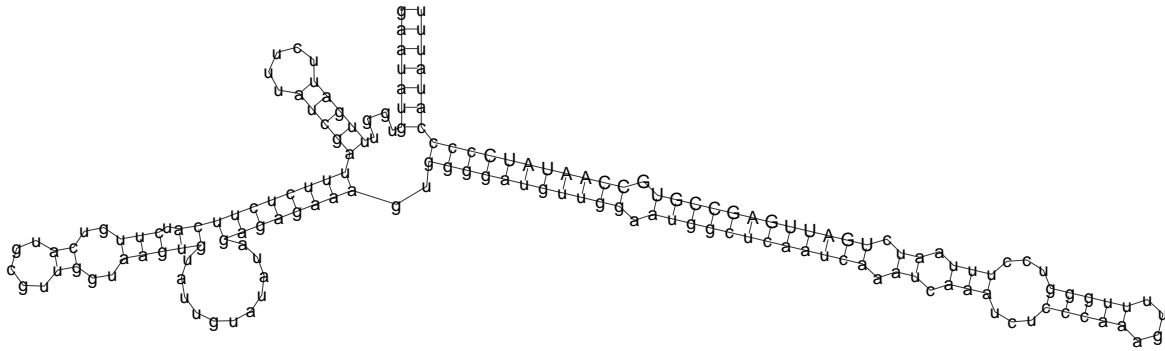

rco-miR171g

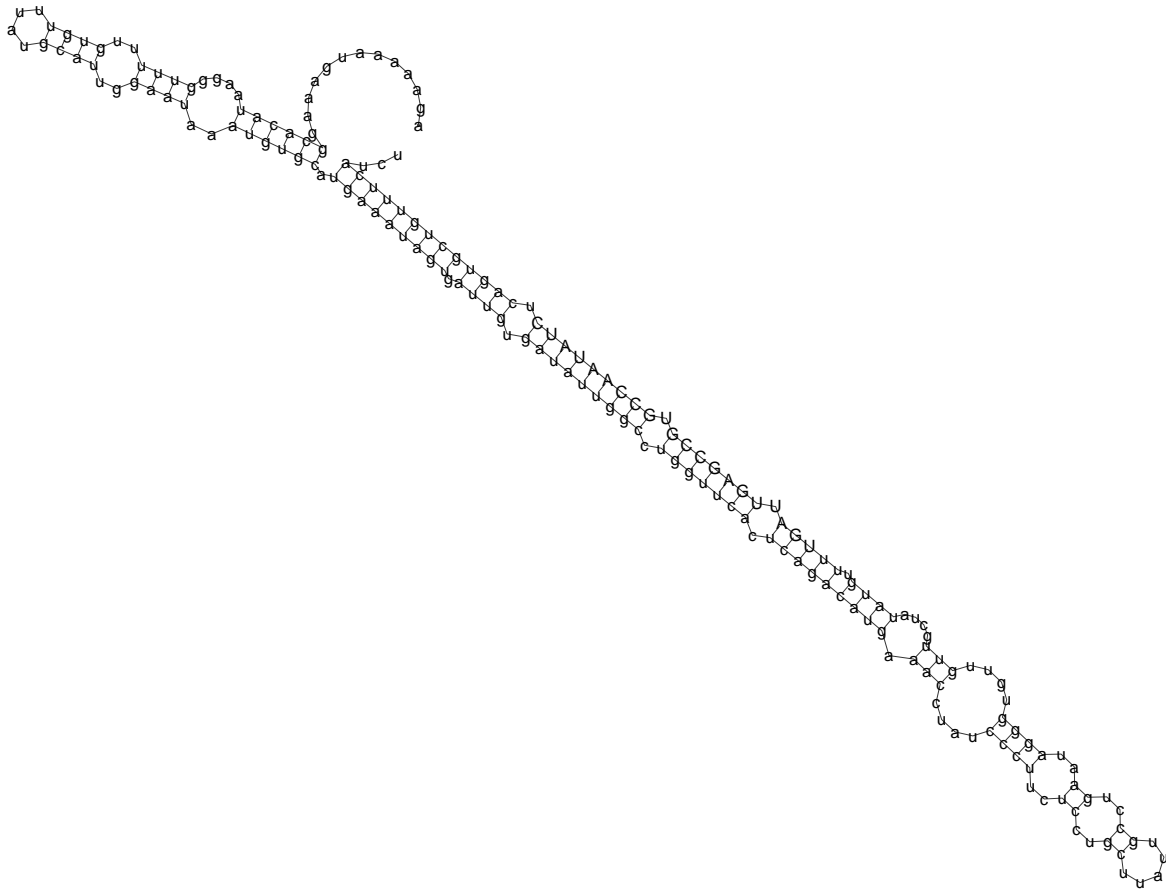

rco-miR171h

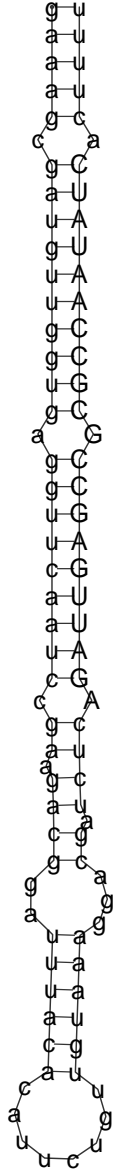



rco-miR171i

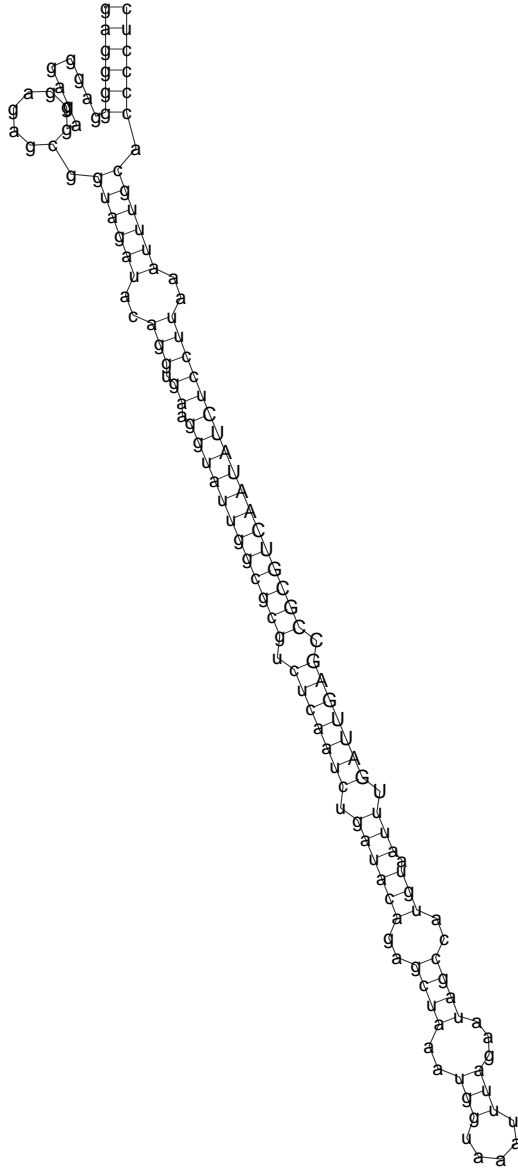

rco-miR172a

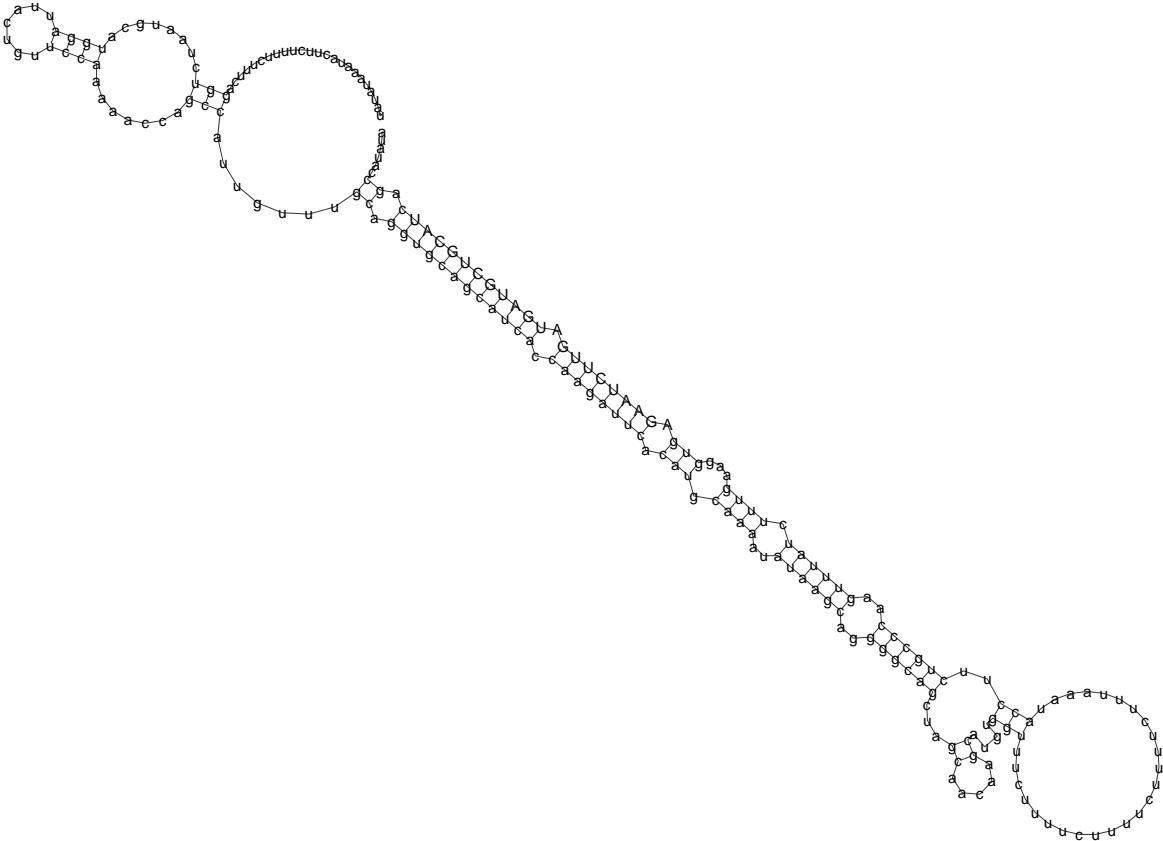

rco-miR172b

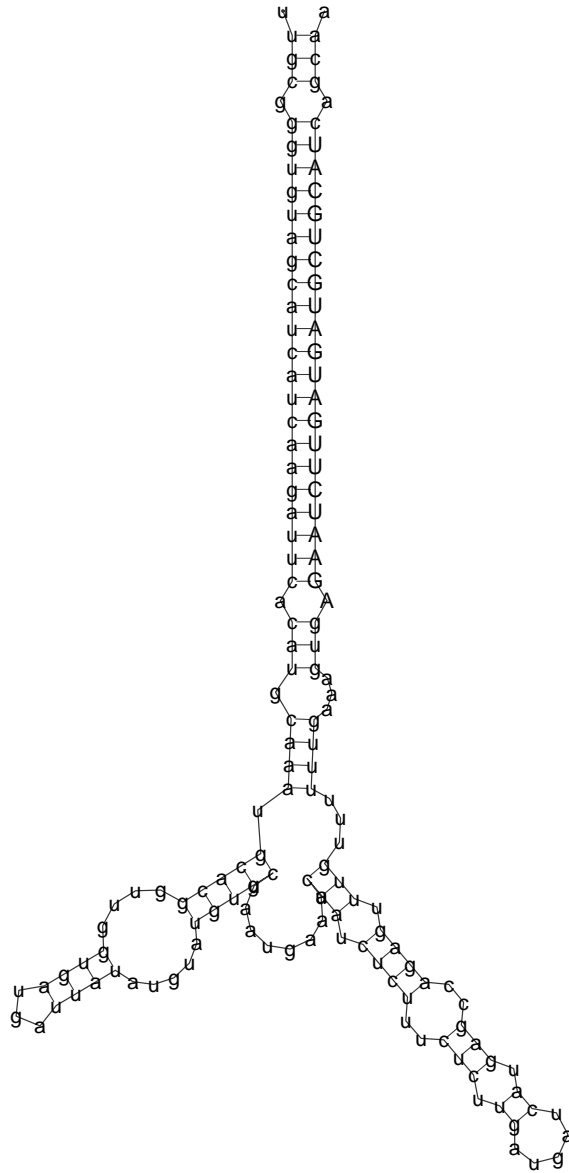



rco-miR172d

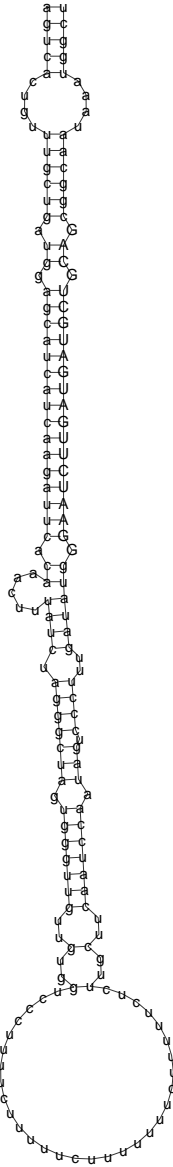

rco-miR319a

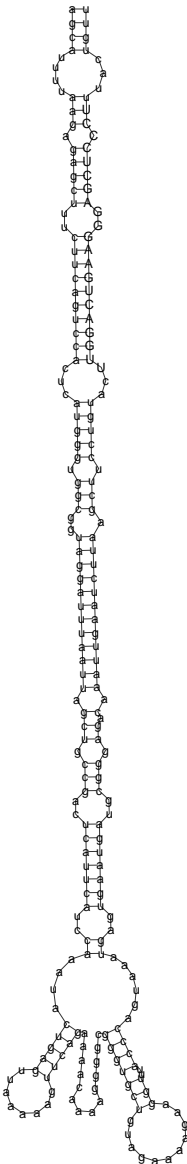

rco-miR319b

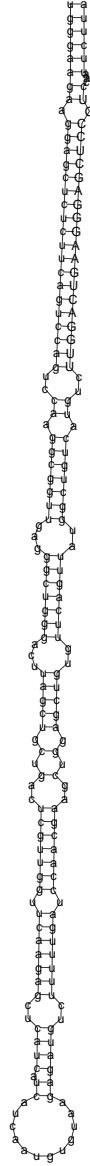

rco-miR319c

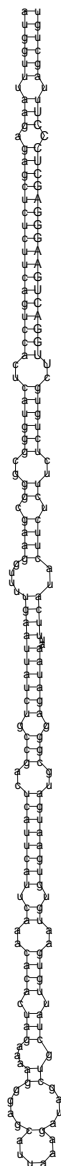



rco-miR319d

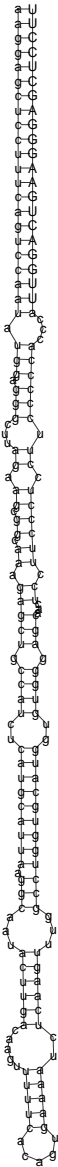



rco-miR390b

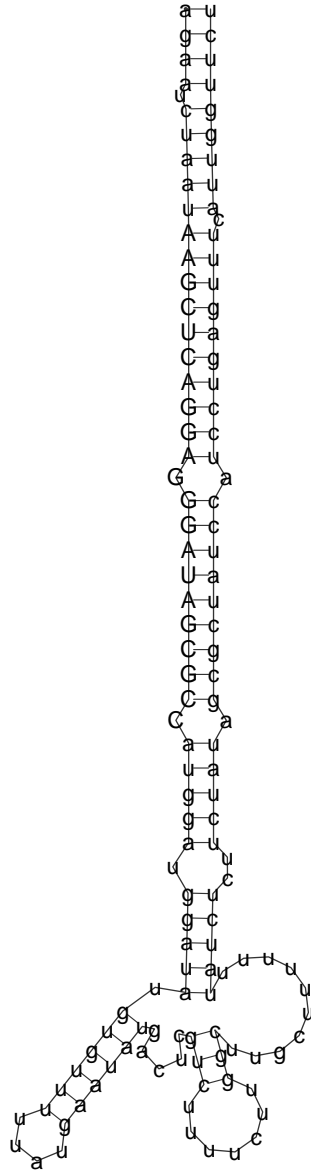







rco-miR395b

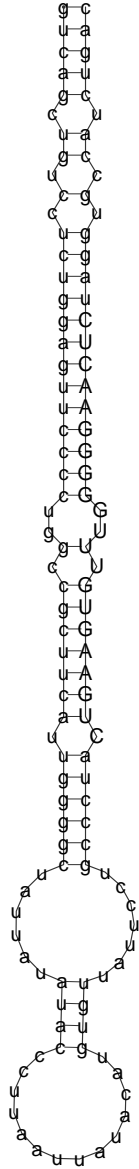

rco-miR395c

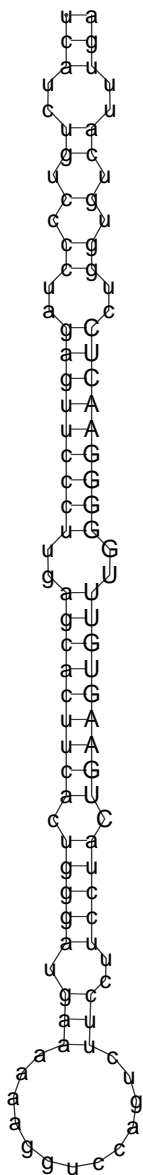







rco-miR396a

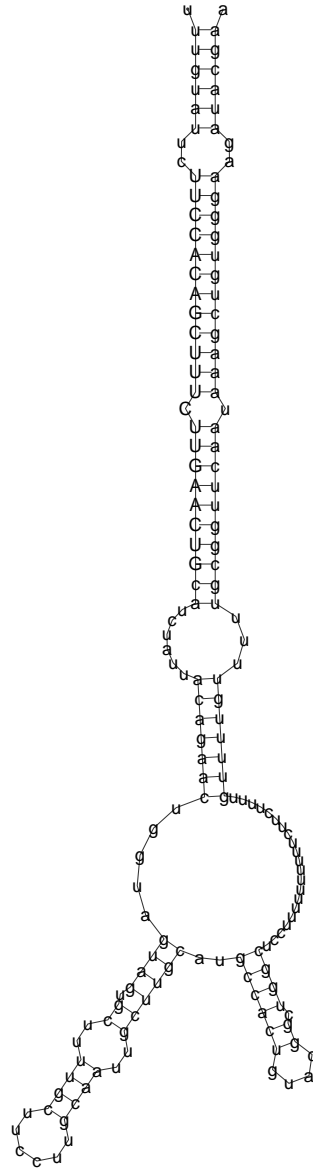

rco-miR396b

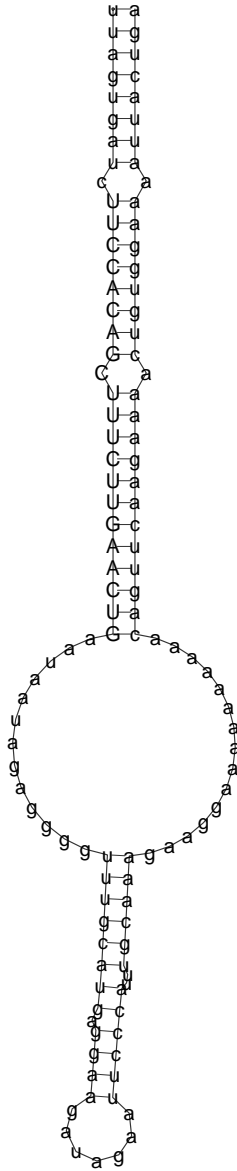

rco-miR396c

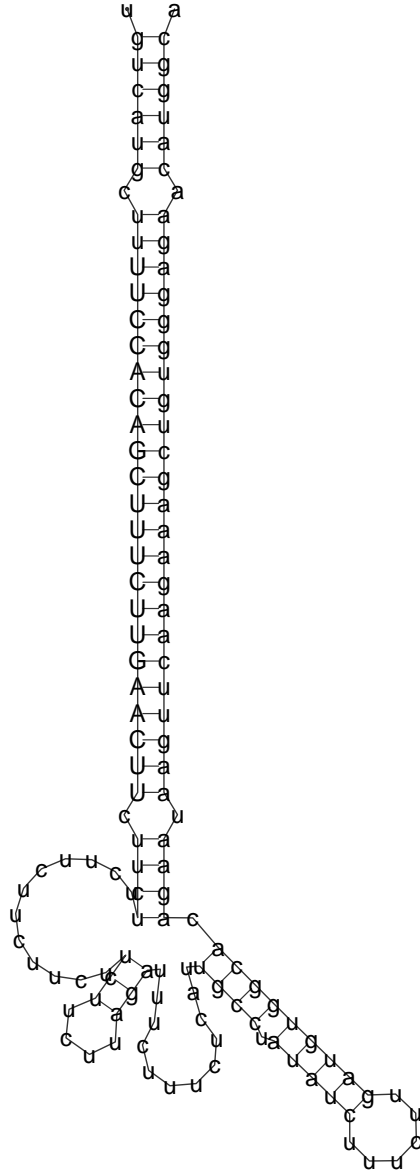



rco-miR398a

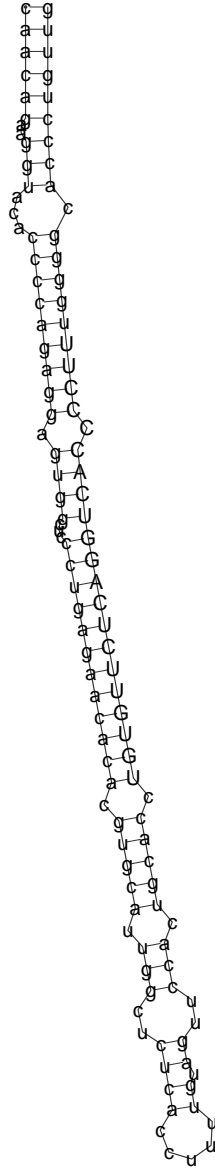

rco-miR398b

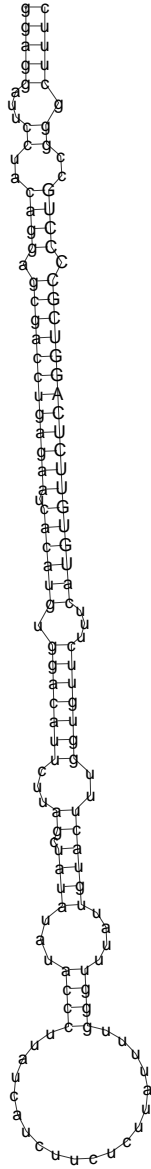



rco-miR399a

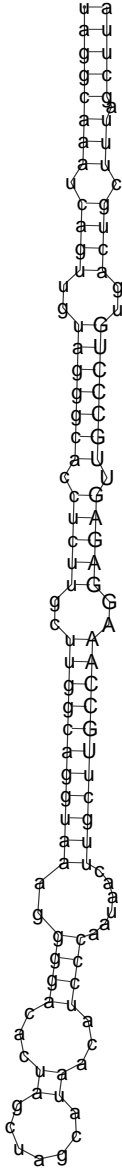



rco-miR399c

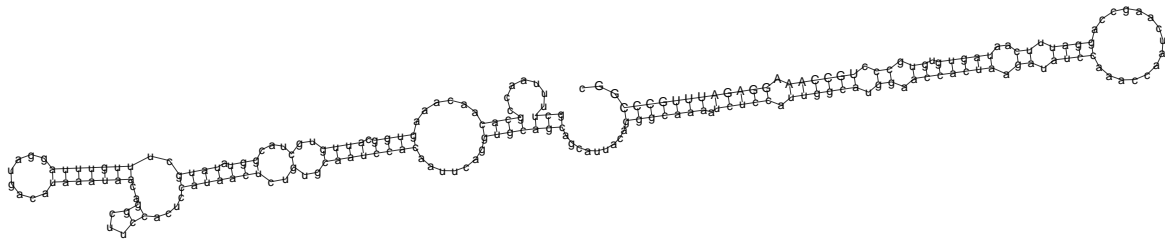

rco-miR399d

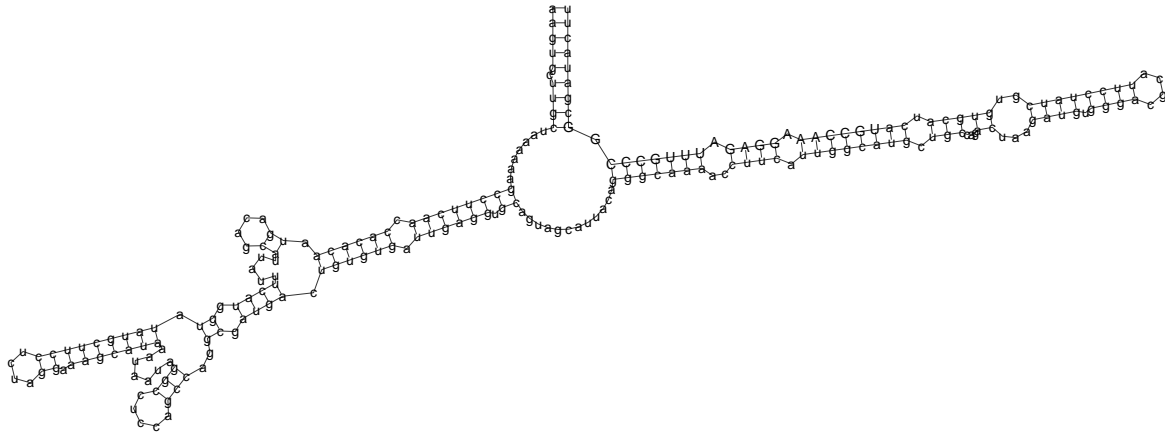

rco-miR399e

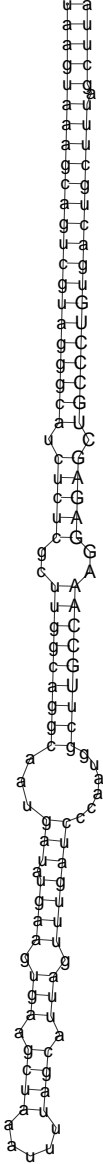



rco-miR399g

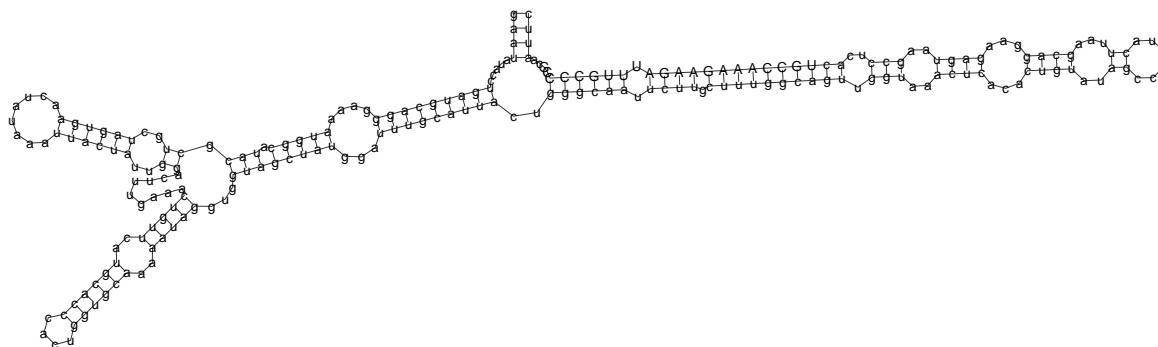

rco-miR399h

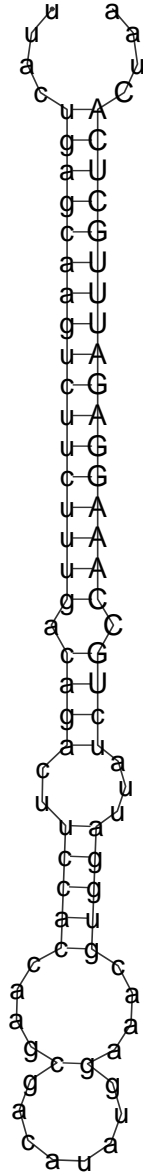









rco-miR408

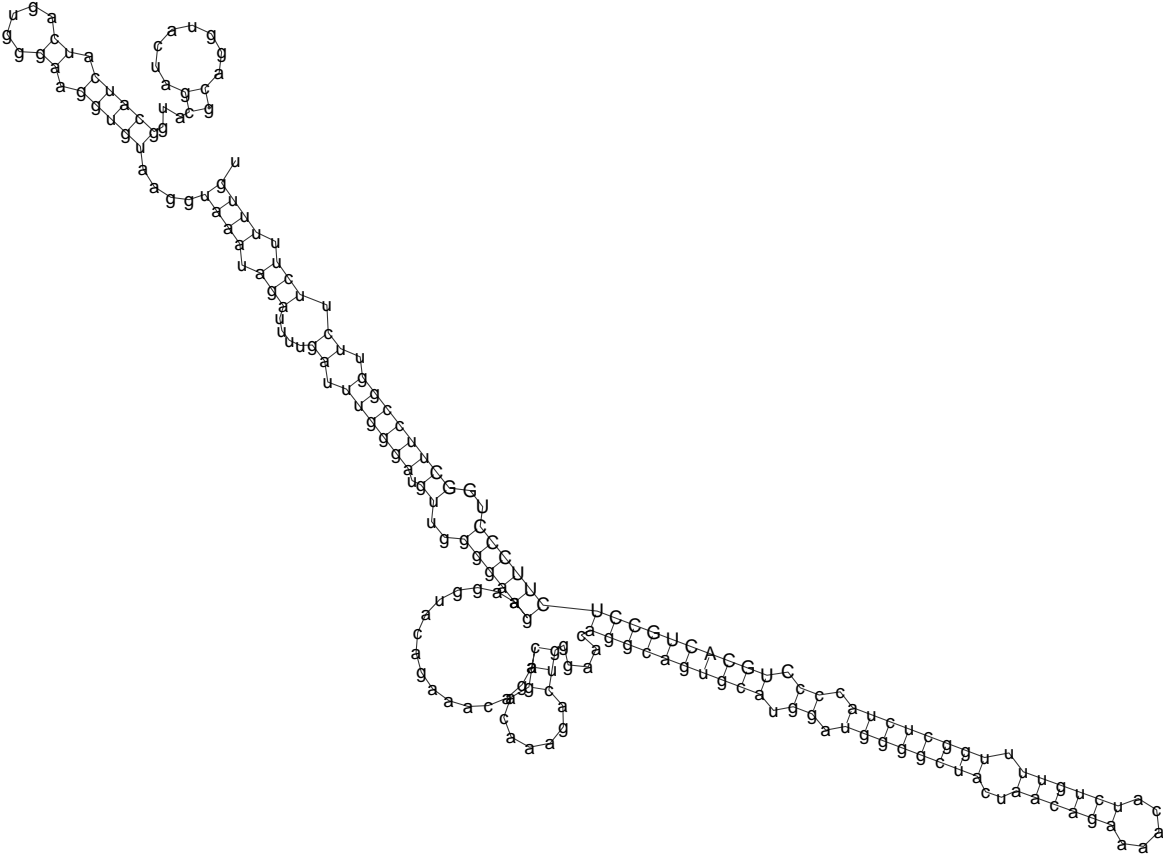

Supplement: gkp1035_1.pdf [file gkp1035_1.pdf]
