# Supplementary material for: Conservation and divergence of microRNAs and their functions in Euphorbiaceous plants
Source: PubMed Central journal article supplement — Nucleic Acids Res. 2009 Nov 26;38(3):981–95. doi: 10.1093/nar/gkp1035 (PMC2817462; doi:10.1093/nar/gkp1035), 2009-11-26

**Supplementary Figure S2.** The end-point RT-PCR results of miRNAs covered by all 55 member-specific primers in seedling development of four Euphorbiaceous species, including two varieties of Castor bean (Hela and Hainan), a Cassava (SC124), a Rubber tree (73397), a Jatropha (Landrace), and a negative control (no template control, NTC). Amplification of ~85bp products will be regarded as expressed miRNAs where the band appeared in 1% agarose gel.

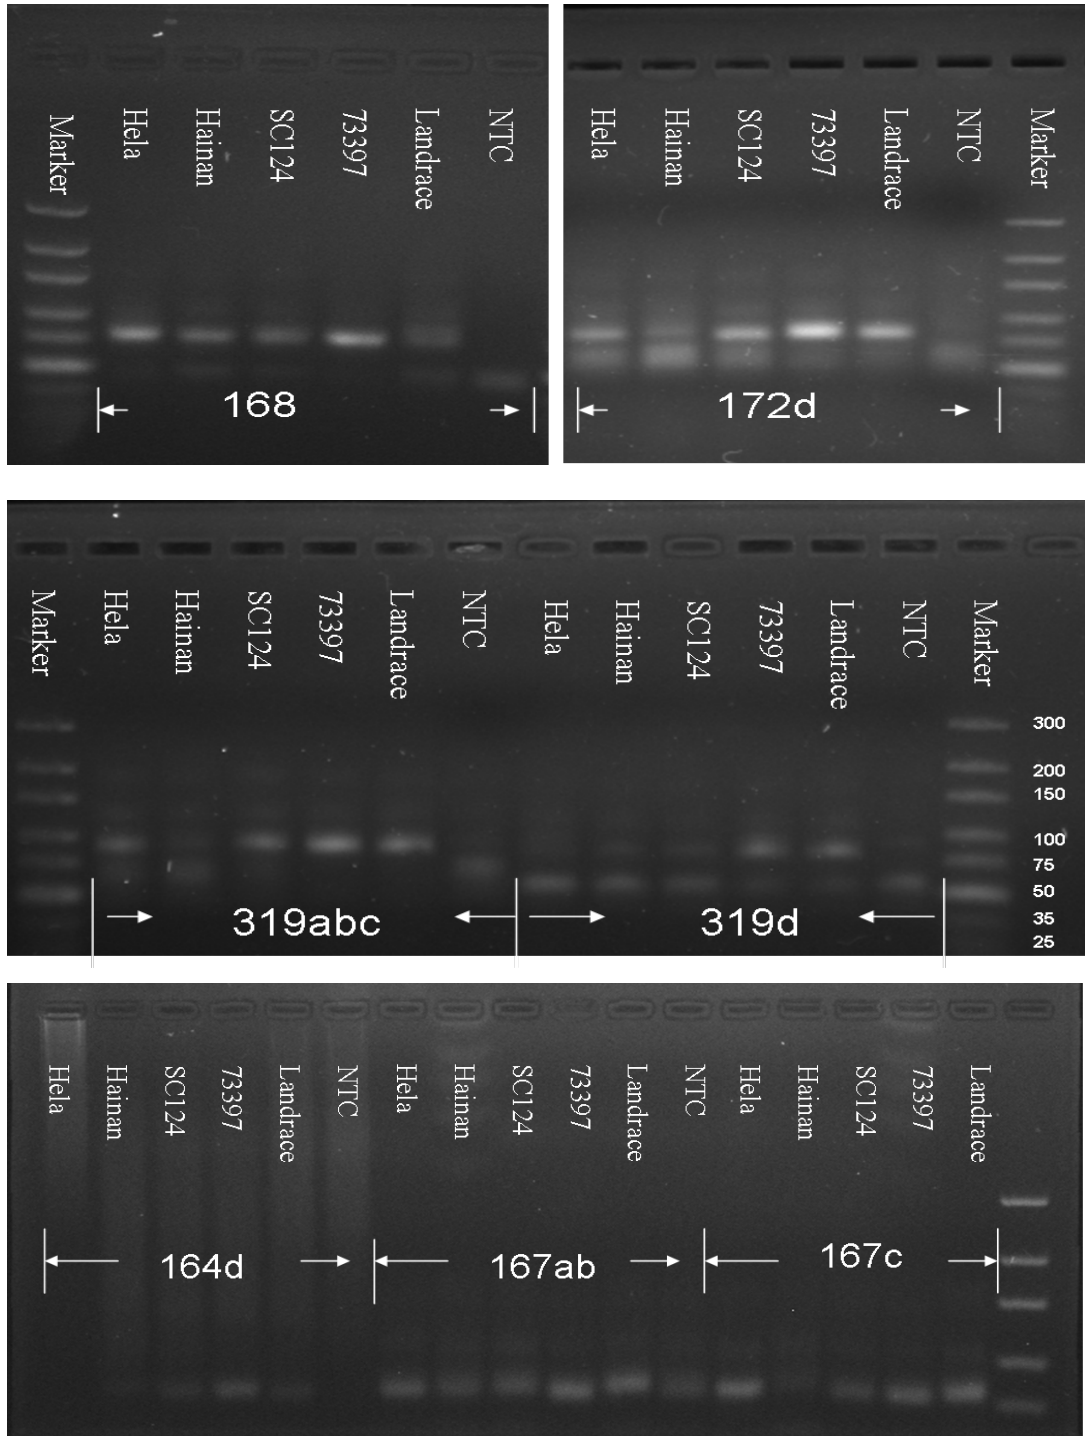

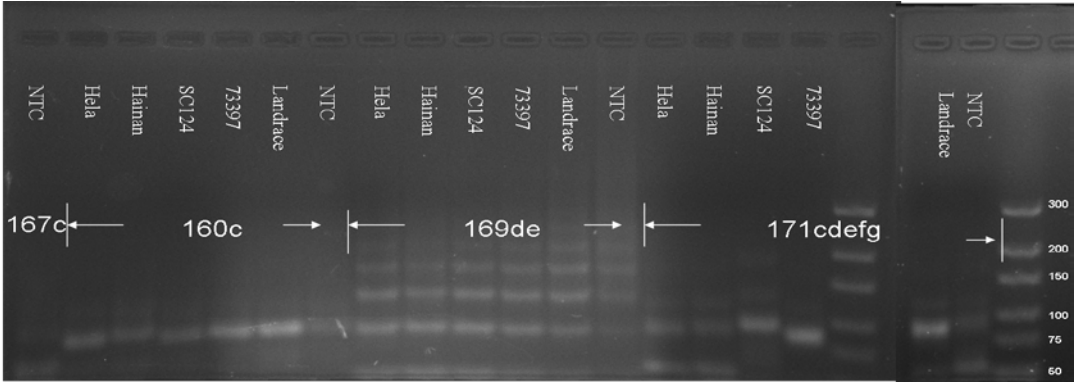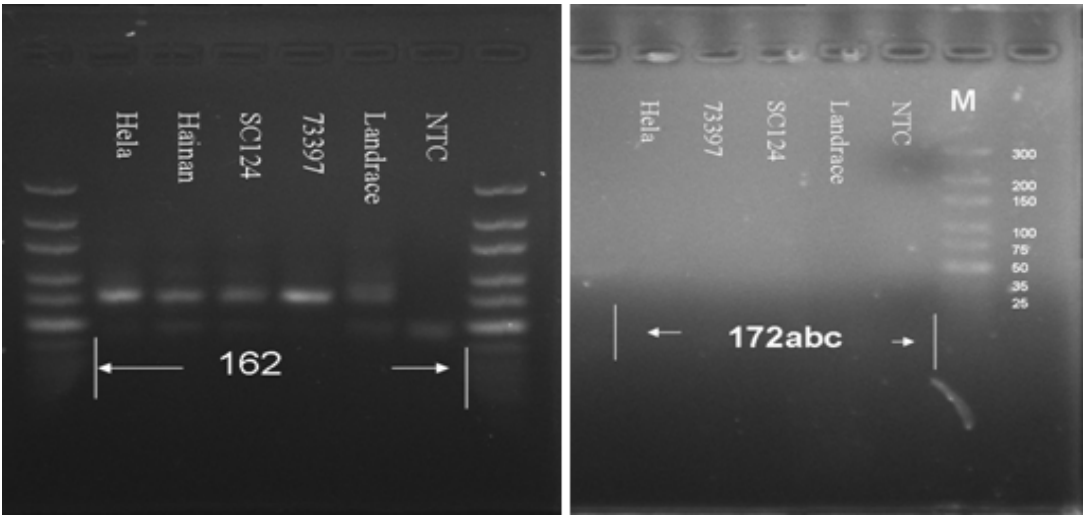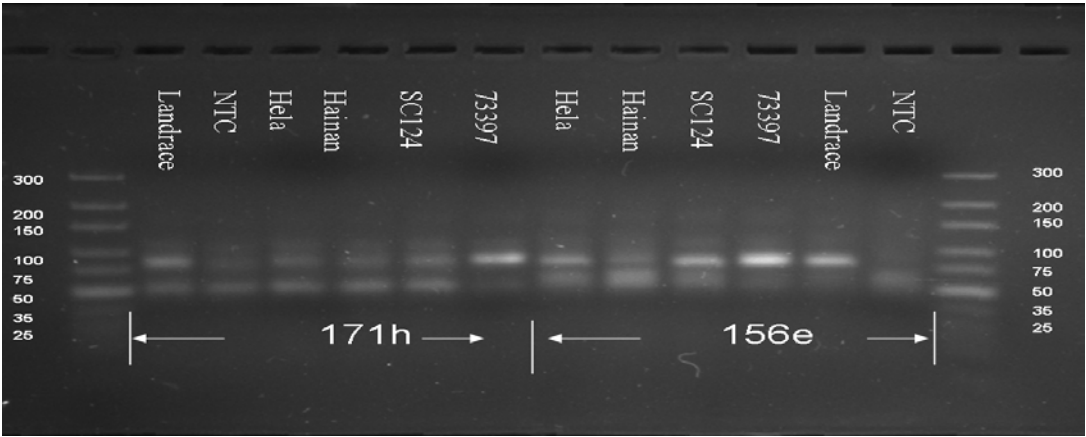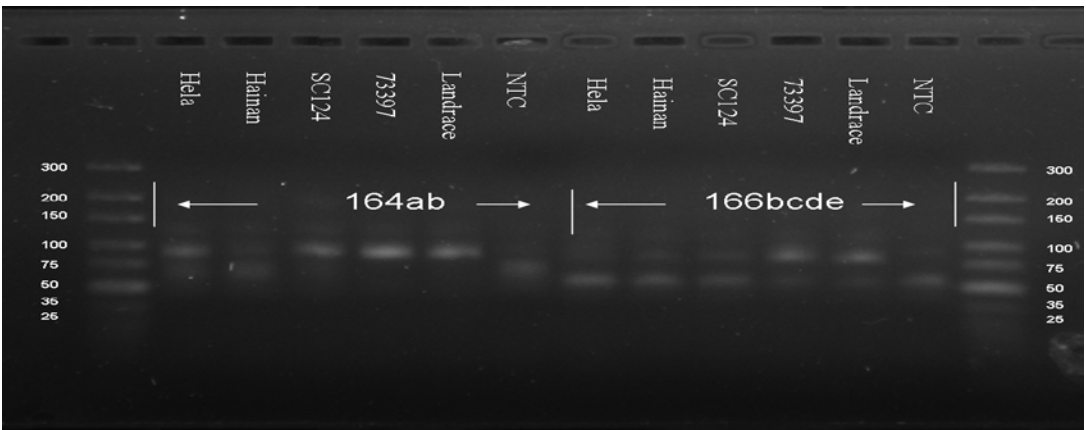

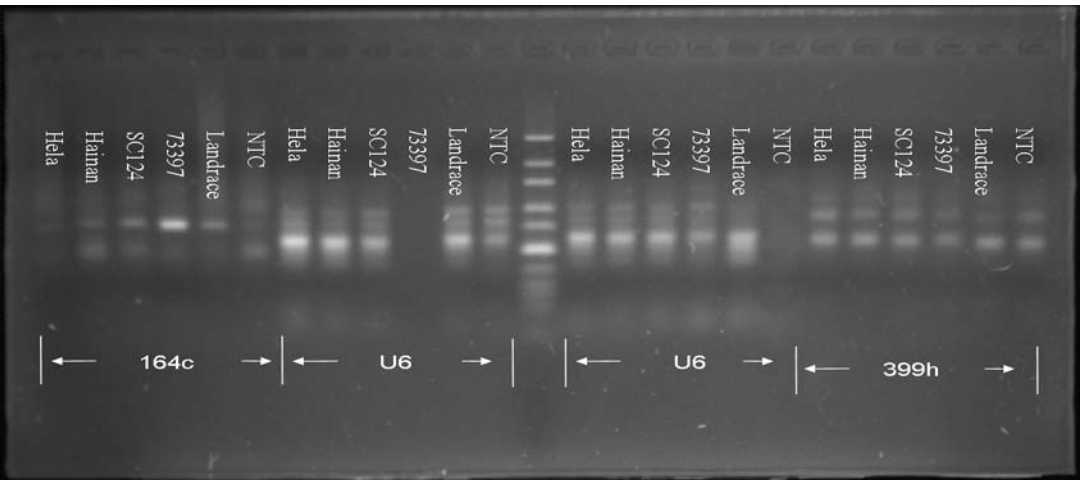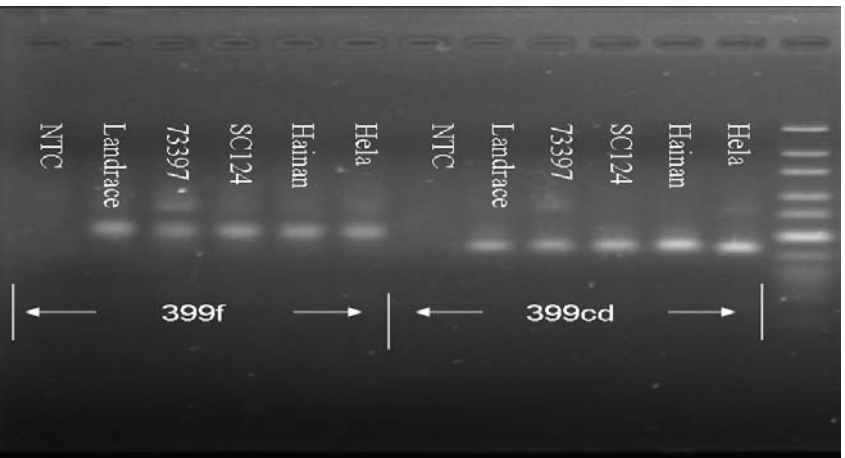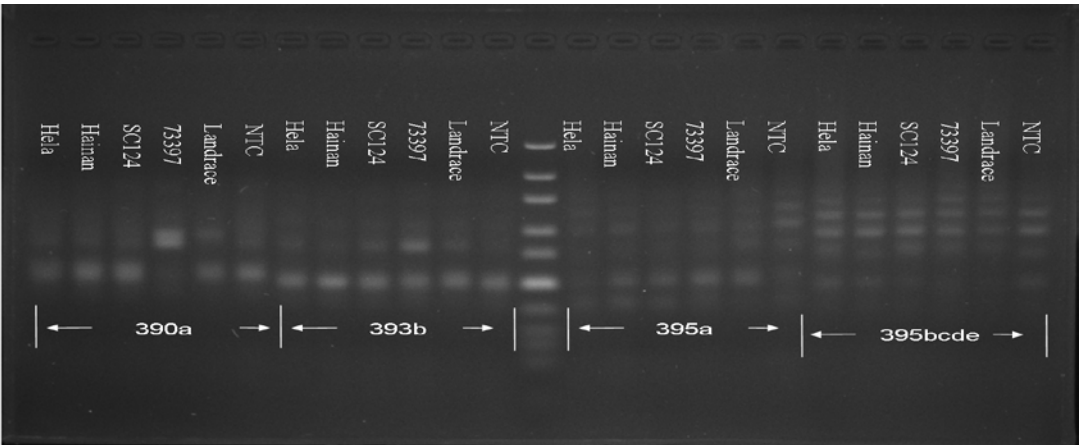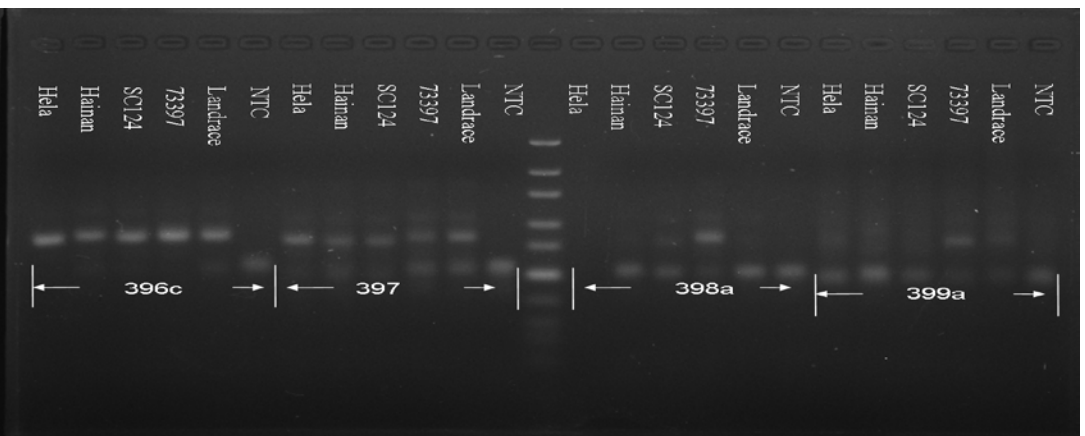

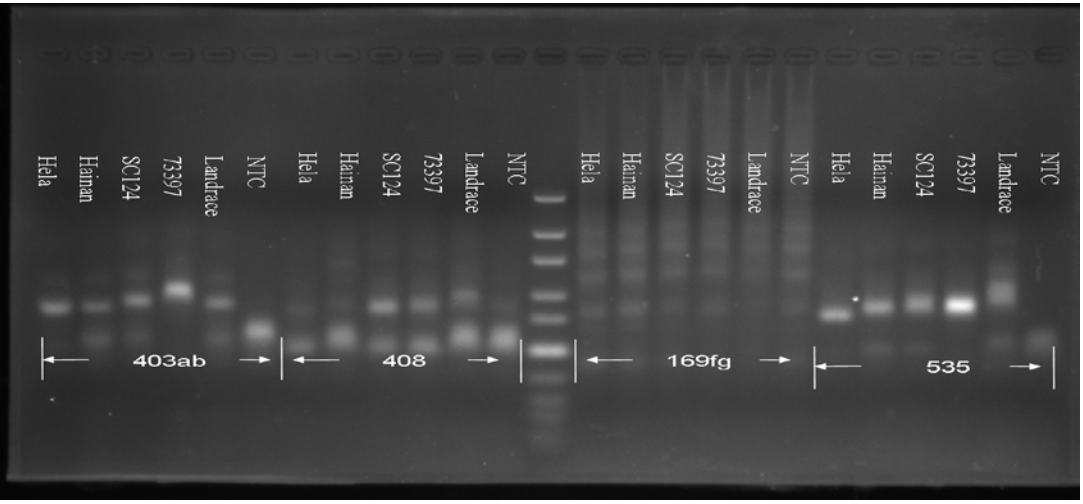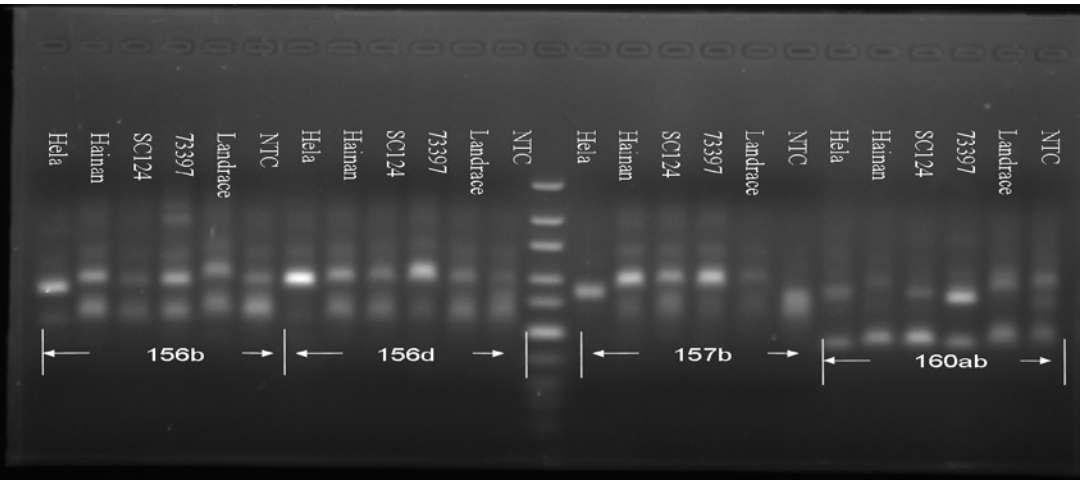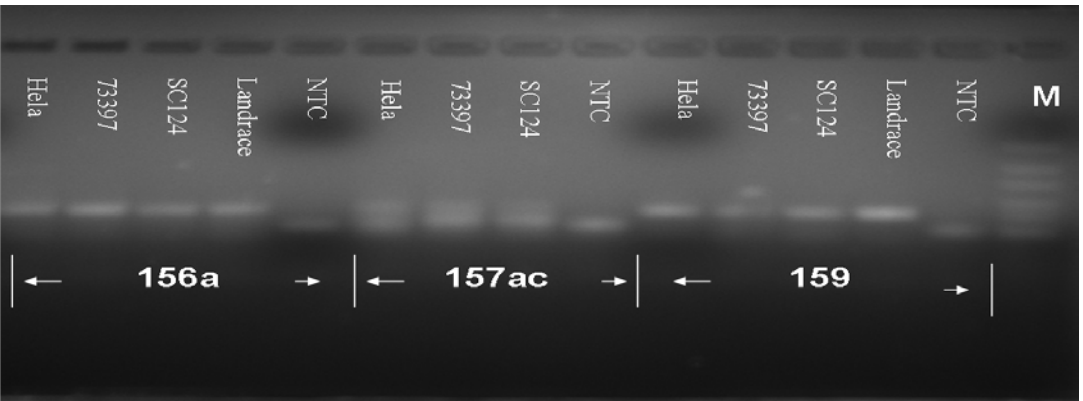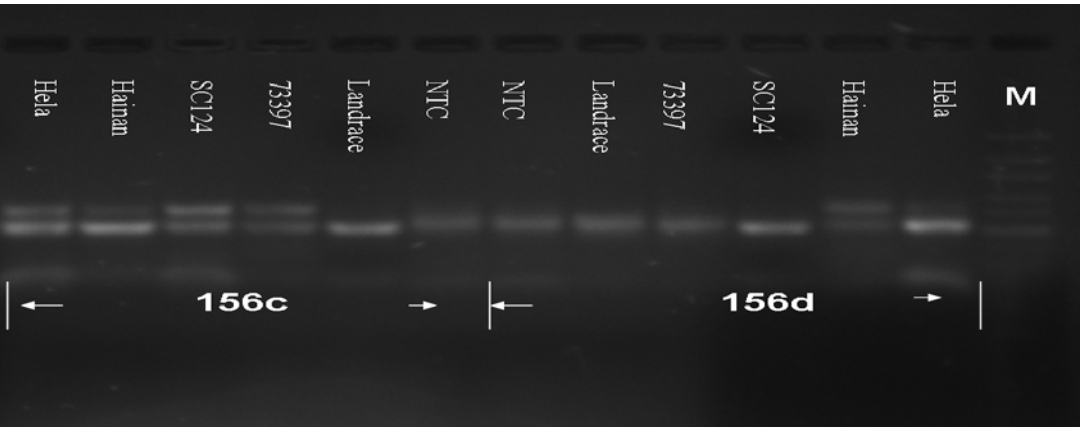

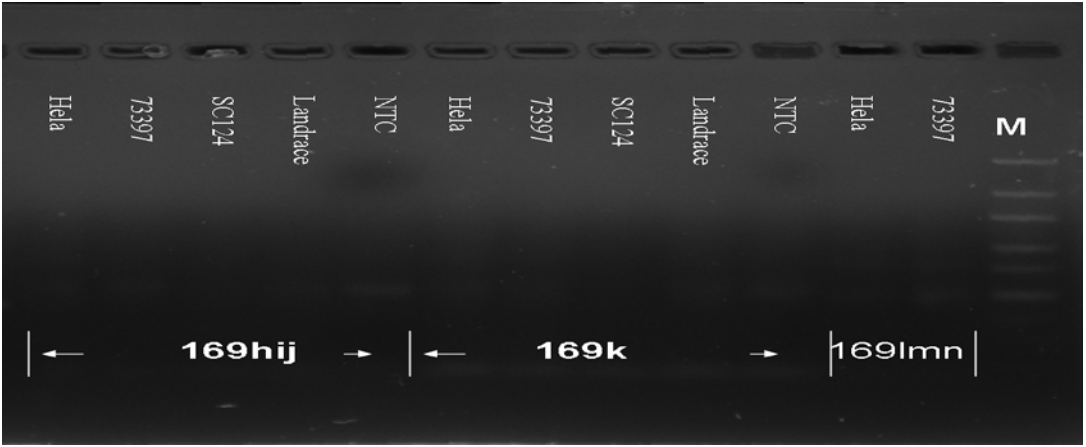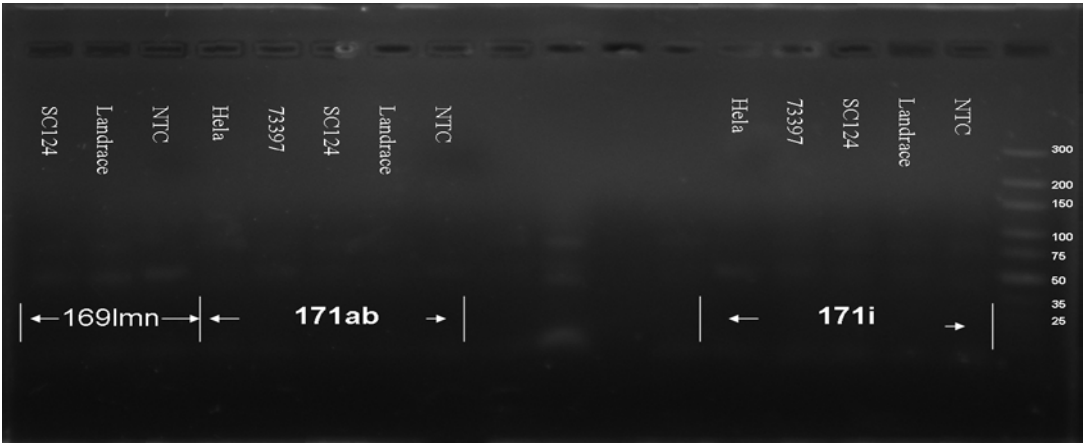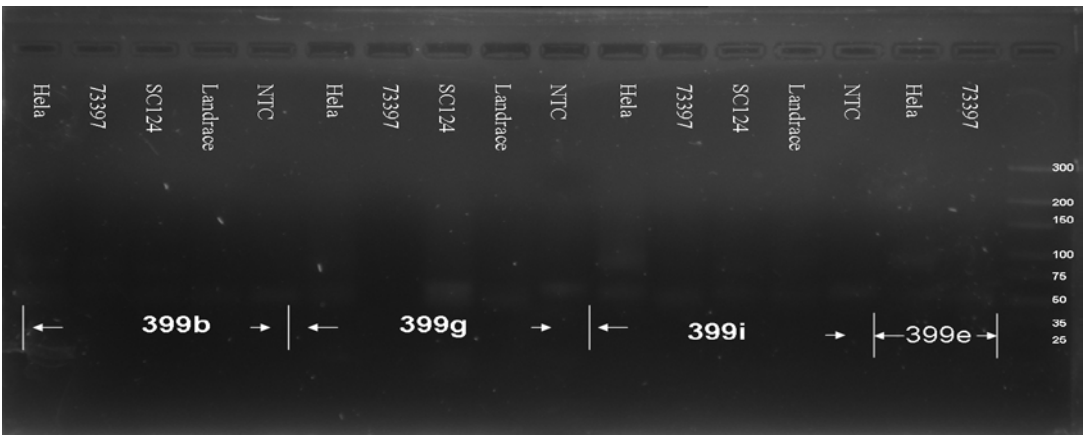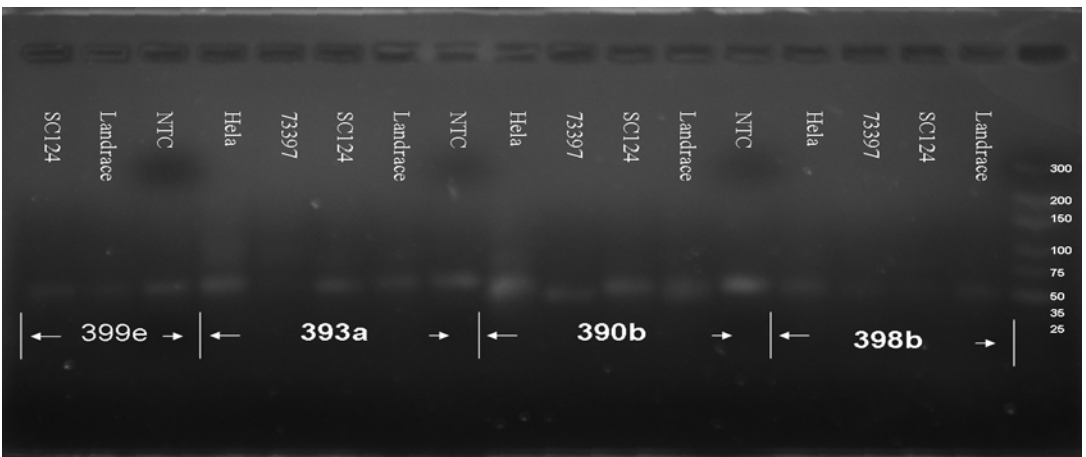

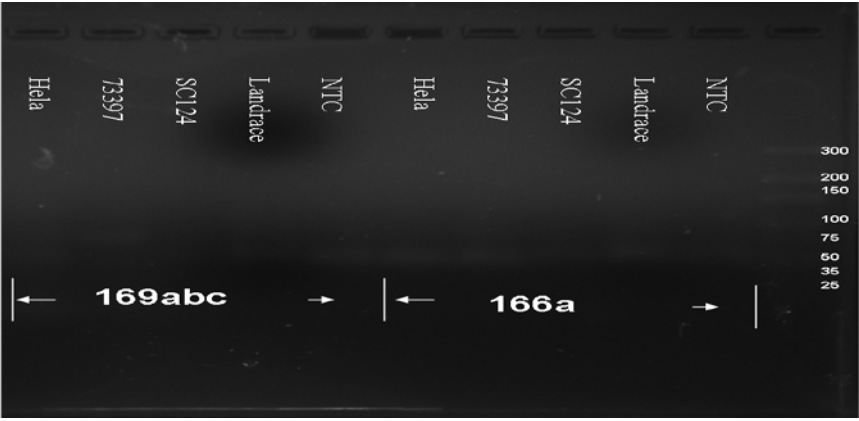

Supplement: gkp1035_2.pdf [file gkp1035_2.pdf]
