# Supplementary material for: Conservation and divergence of microRNAs and their functions in Euphorbiaceous plants
Source: PubMed Central journal article supplement — Nucleic Acids Res. 2009 Nov 26;38(3):981–95. doi: 10.1093/nar/gkp1035 (PMC2817462; doi:10.1093/nar/gkp1035), 2009-11-26

**Supplementary Figure S3.** The end-point RT-PCR results of miRNAs covered by all 55 member-specific primers in the Castor bean (Hela) and the two Cassava varieties (SC124 and C4) under either cold stress, drought stress or during stress recovery processes. A negative control (no template control, NTC) was included for each primer combination. Amplification of ~85bp products will be regarded as expressed miRNAs where the band appeared in 1% agarose gel. The samples used are the same as Supplemental Table S1.

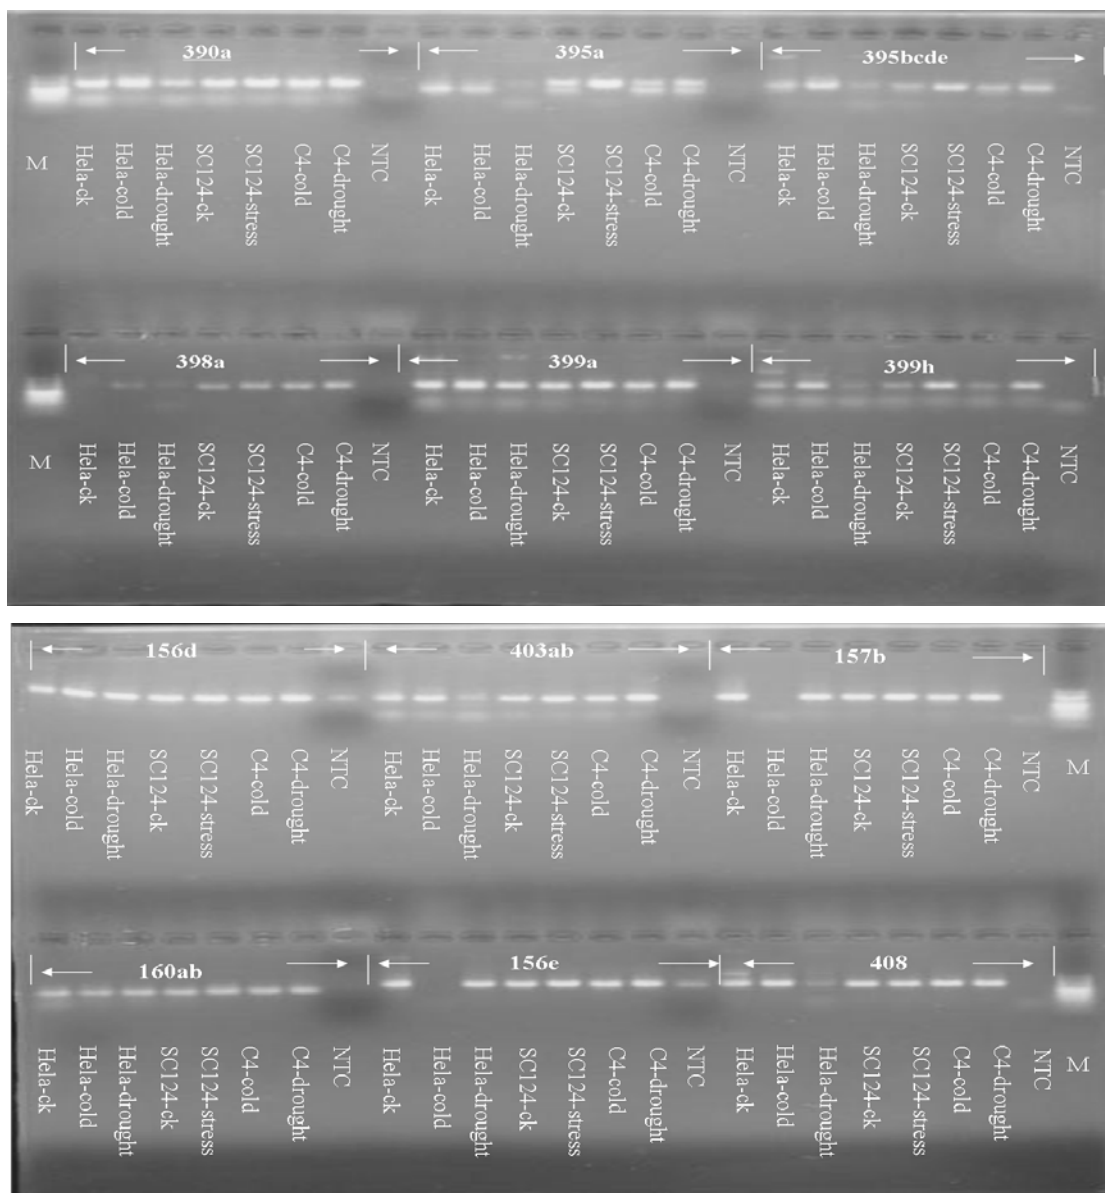

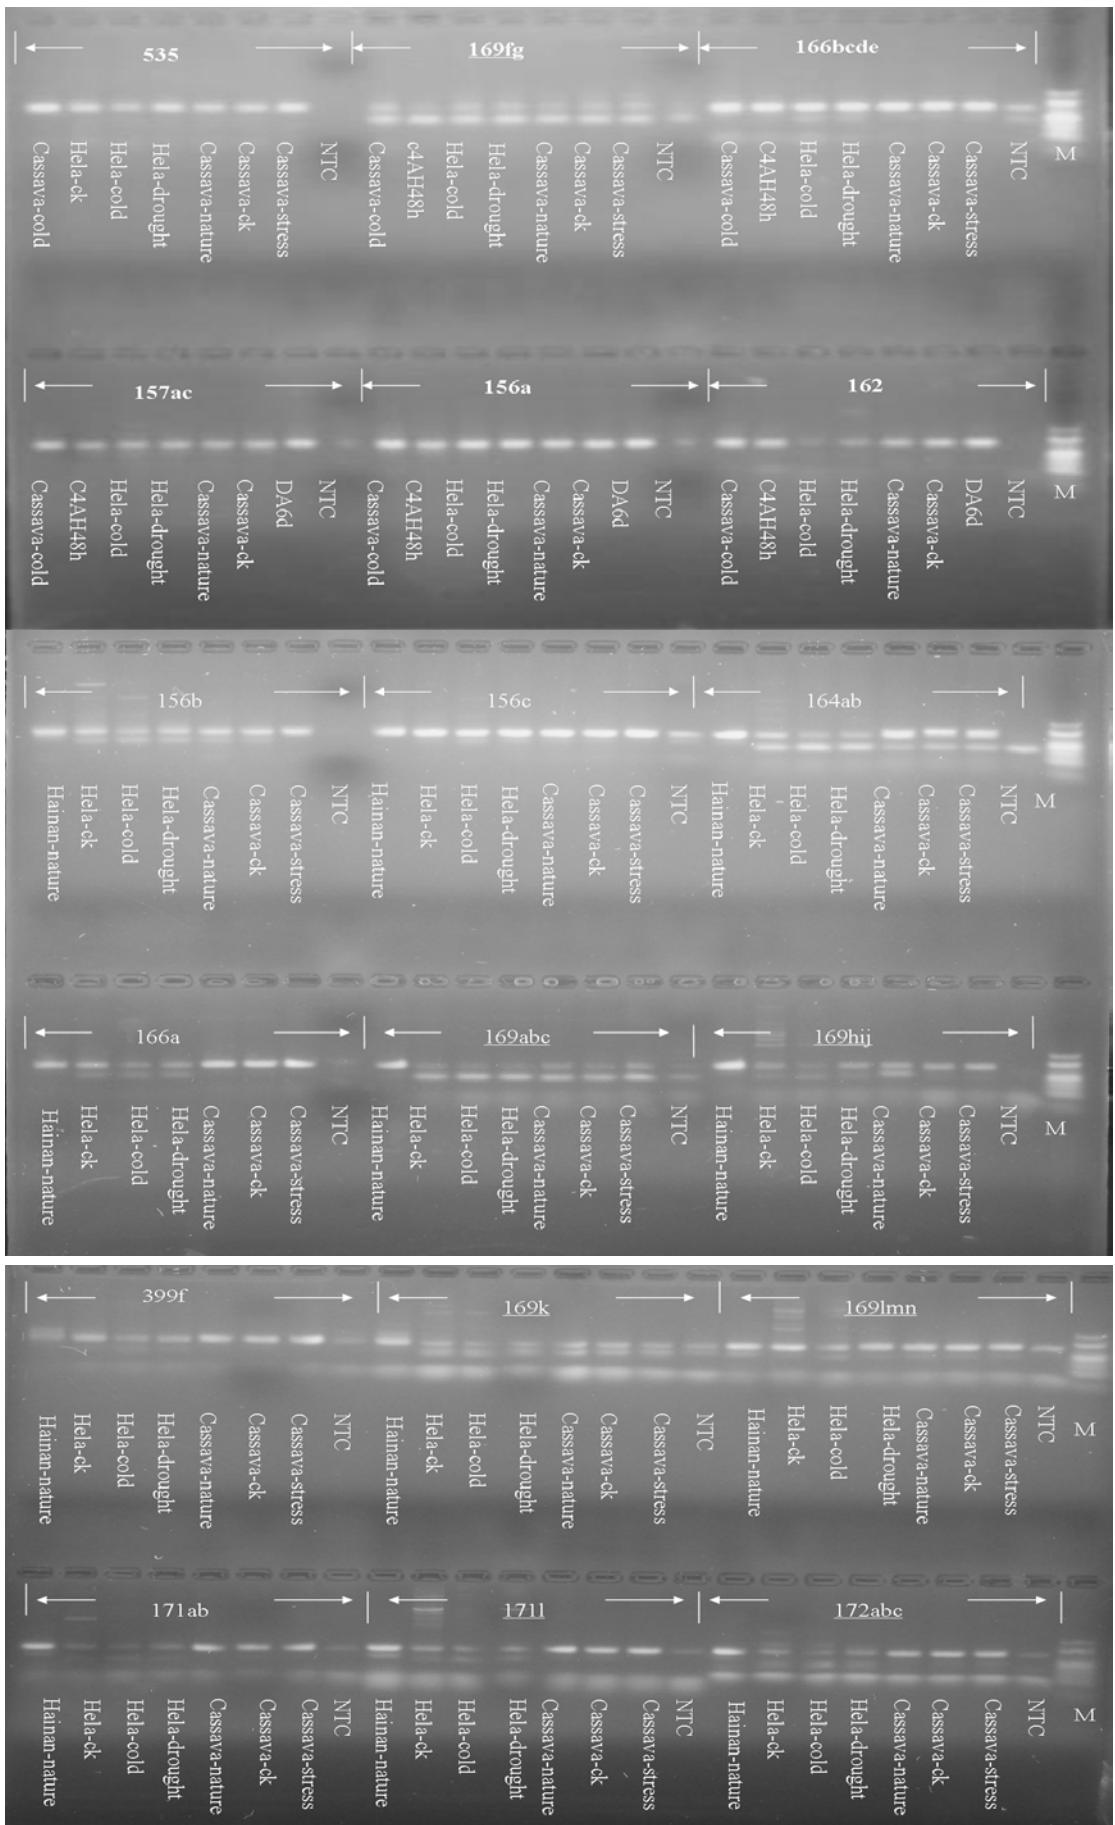

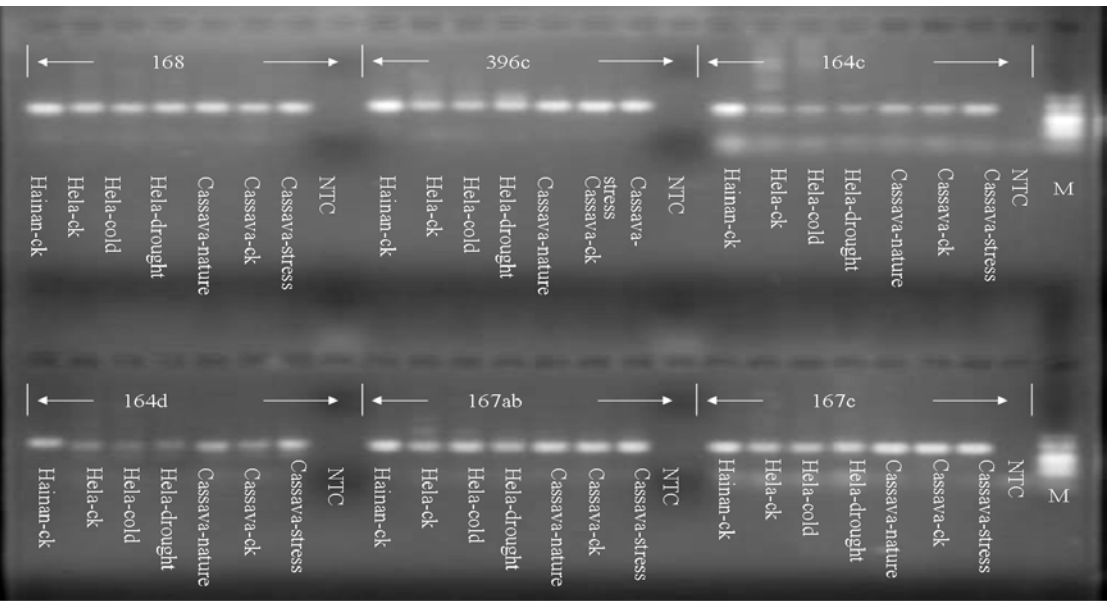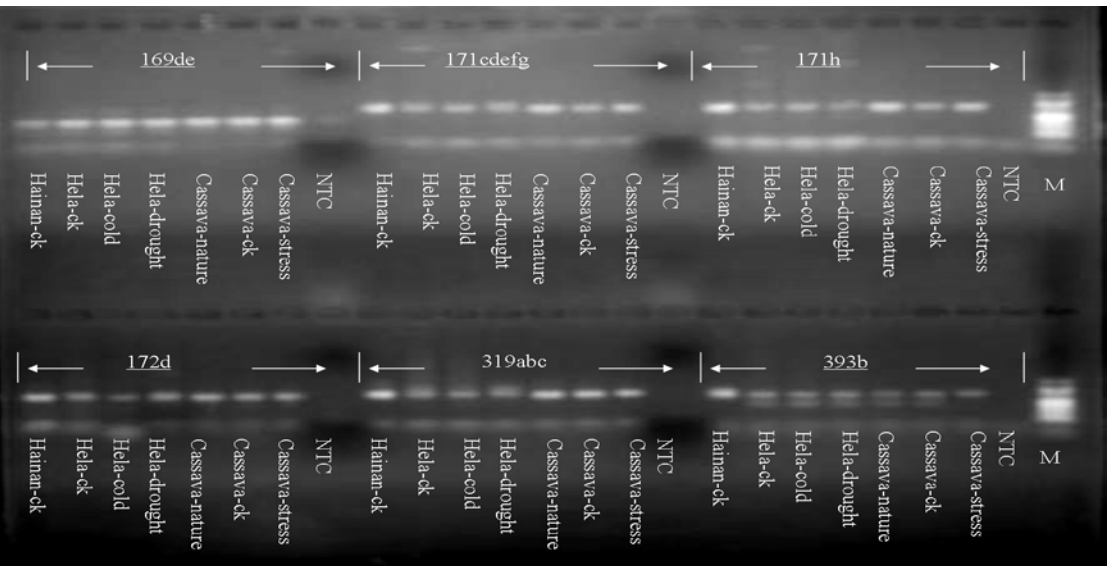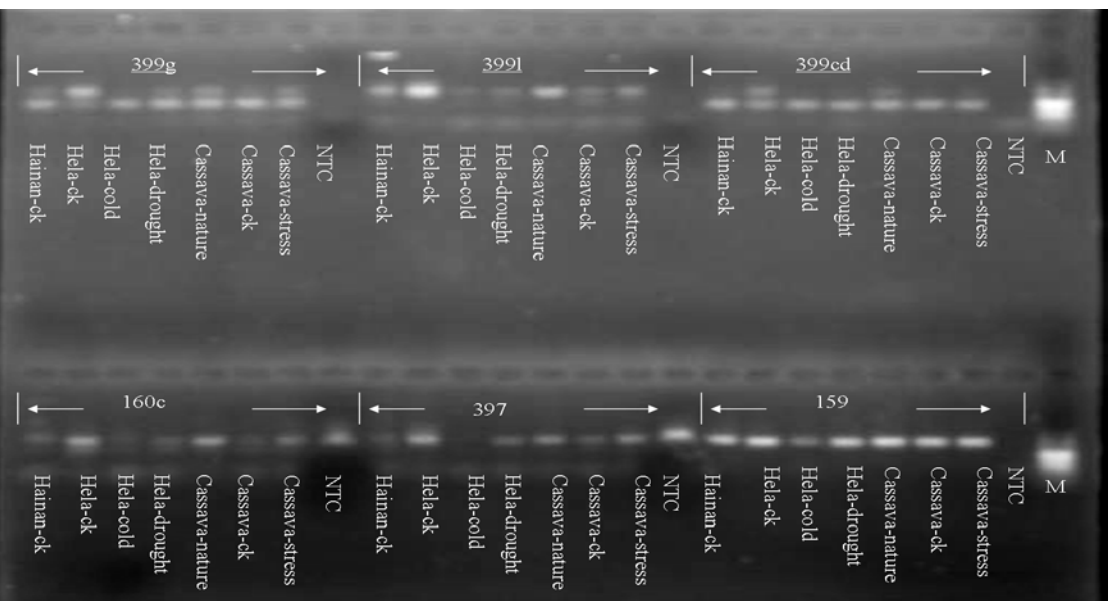

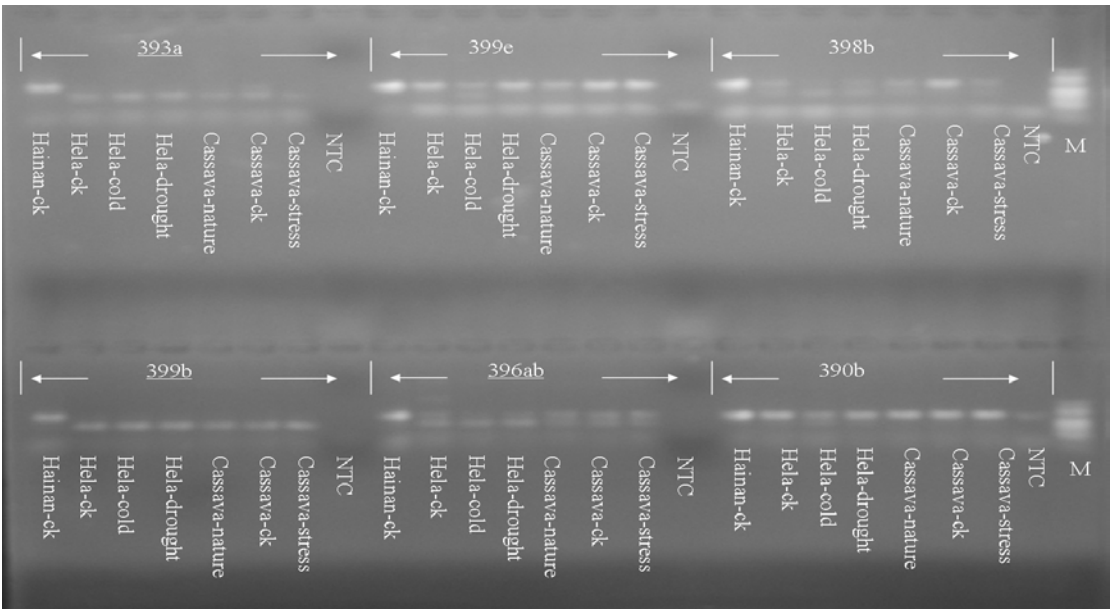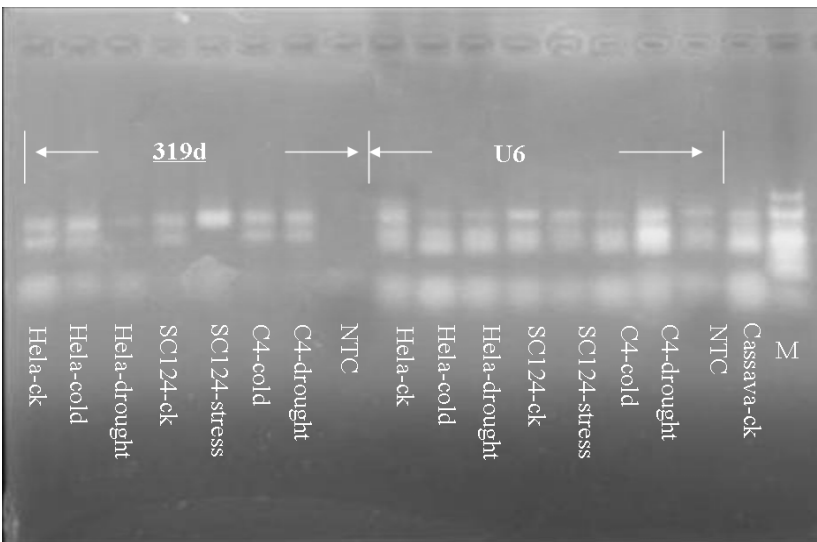

Supplement: gkp1035_3.pdf [file gkp1035_3.pdf]
